# Supplementary material
Source: ML conference proceedings conference paper supplement (https://openreview.net/forum?id=WHqVVk3UHr)
Supplement: supplementary_material [file attachment]

# Appendix

## Table of Contents

---

|          |                                                                                                         |           |
|----------|---------------------------------------------------------------------------------------------------------|-----------|
| <b>A</b> | <b>The Model Set Representation</b>                                                                     | <b>16</b> |
| <b>B</b> | <b>The TreeFARMS Algorithm</b>                                                                          | <b>17</b> |
| <b>C</b> | <b>Sampling from the Rashomon Set</b>                                                                   | <b>19</b> |
| <b>D</b> | <b>Model Class Reliance of Decision Trees</b>                                                           | <b>19</b> |
| <b>E</b> | <b>Theorems and Proofs</b>                                                                              | <b>21</b> |
| <b>F</b> | <b>Experimental Datasets</b>                                                                            | <b>29</b> |
|          | F.1 Preprocessing . . . . .                                                                             | 30        |
| <b>G</b> | <b>More Experimental Results</b>                                                                        | <b>31</b> |
|          | G.1 Scalability and Efficiency of Calculating Rashomon set with TreeFARMS versus<br>Baselines . . . . . | 31        |
|          | G.2 Landscape of the Rashomon set . . . . .                                                             | 32        |
|          | G.3 Variable Importance: Model Class Reliance . . . . .                                                 | 33        |
|          | G.4 Balanced Accuracy and F1-score Rashomon set from Accuracy Rashomon set . .                          | 34        |
|          | G.5 Rashomon set after removing a group of samples . . . . .                                            | 36        |

---

## A The Model Set Representation

In Section 4, we described the Model Set representation for the Rashomon Set. Figures 6 and 7 illustrate these data structures in more detail. Figure 6 introduces major components of our Model Set Instance (MSI) representation. Figure 7 provides an example of the representation on a toy dataset.

The Model Set representation’s memory efficiency stems from two key properties: grouping models for the same subproblem together and then referencing these subproblems rather than duplicating them. Figure 7 illustrates this for a tiny, 10-sample dataset. Let’s say that our Rashomon threshold is 0.40 and that we can split the entire problem on some feature to produce left and right children, each containing exactly half the data set – the first five samples for the left subproblem and the last five samples for the right subproblem.

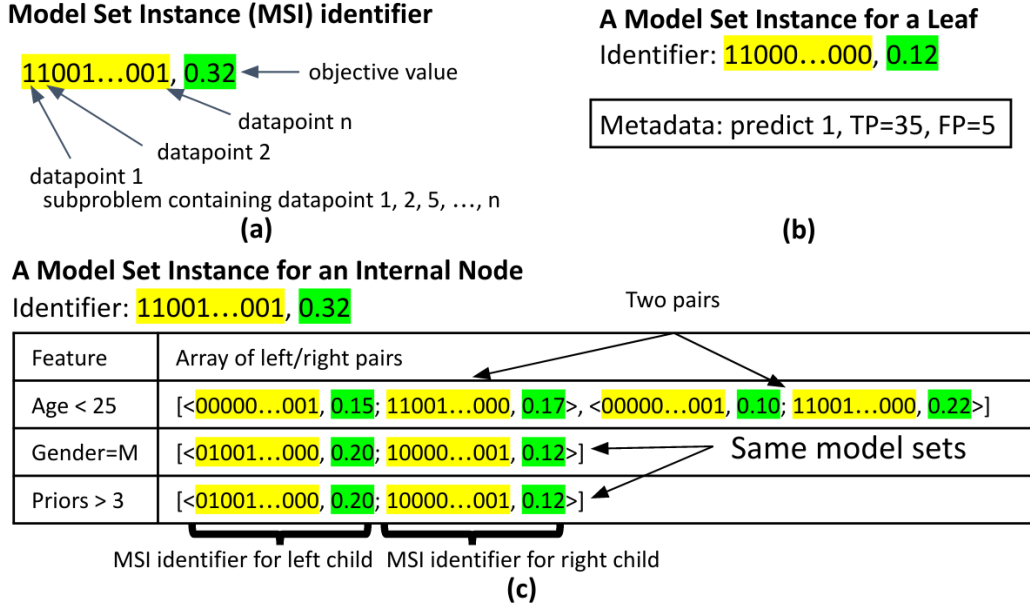

Figure 6: Model Set Instance (MSI) Representation. Each MSI represents a subproblem (yellow)/objective (green) pair (a). The subproblem is described by a bitvector identifying the samples in the subproblem. Figure (b) represents a leaf subproblem with objective 0.12. Figure (c) represents a subproblem that can be split to produce an objective of 0.32. There are three features (age, gender, and priors) for which a split produces this objective. If we split on age<25, then there are two different pairs of identifiers that both produce objectives of 0.32 (represented by the two pairs of MSI identifiers). Each pair of identifiers would further split on different features and have different tree structures. The splits on gender and priors happen to produce the same pair of model set instances, as shown by the matching MSI identifiers in the bottom two lines of the table. Referencing these sets of trees by MSIs avoids massive data duplication.

*extract* (see Algorithm 2, 3) looks up the left subproblem and finds that there are three MSIs for it, L1 represents a leaf and L2 and L3 each represent internal nodes with different objectives, each of which produce that objective in two ways. Thus, on the left, there are five possible trees. On the right, we have only two MSIs, one leaf (R1) and one internal node (R2). These represent three trees. Although the cross-product of the left and right children produce fifteen trees, we need only consider the 6 possible objectives values produced by combining each pair of model sets (i.e., L1+R1, L1+R2, L2+R1, etc.). All but one of these satisfy the Rashomon threshold of 0.40 (L1+R1 produces an objective of 0.50, which is greater than the threshold), and they produce only three new model sets: one with objective 0.40 containing the two trees produced by combining L1 and R2 and the two trees produced by combining L2 and R1; one with objective 0.30 containing the four trees produced by combining L2 and R2 and the two trees produced by combining L3 and R1; and one with the objective 0.20 containing the four trees represented by combining L3 and R2.

All Model set instances for left child:

subproblem **1111100000**

L1. Identifier: **1111100000**, **0.30**

Leaf: Predicts T; 1 FP, 2 FN

L2. Identifier: **1111100000**, **0.20**

| Feature | Array of left/right pairs                                               |
|---------|-------------------------------------------------------------------------|
| F1      | [< <b>1111000000</b> , <b>0.15</b> ; <b>0000100000</b> , <b>0.05</b> >] |
| F2      | [< <b>0011000000</b> , <b>0.10</b> ; <b>1100100000</b> , <b>0.10</b> >] |

L3. Identifier: **1111100000**, **0.10**

| Feature | Array of left/right pairs                                               |
|---------|-------------------------------------------------------------------------|
| F3      | [< <b>1110000000</b> , <b>0.08</b> ; <b>0001100000</b> , <b>0.02</b> >] |
| F4      | [< <b>0010100000</b> , <b>0.04</b> ; <b>1101000000</b> , <b>0.06</b> >] |

All Model set instances for right child:

subproblem **0000011111**

R1. Identifier: **0000011111**, **0.20**

Leaf: Predicts F; 1 FP, 1 FN

R2. Identifier: **0000011111**, **0.10**

| Feature | Array of left/right pairs                                               |
|---------|-------------------------------------------------------------------------|
| F5      | [< <b>0000010101</b> , <b>0.03</b> ; <b>0000001010</b> , <b>0.07</b> >] |
| F6      | [< <b>0000011100</b> , <b>0.09</b> ; <b>0000000011</b> , <b>0.01</b> >] |

Figure 7: An example model set representation of the left and right children of a root split on a 10-sample dataset with Rashomon threshold of 0.40. In the left child, L1 represents a leaf, and L2 and L3 represent internal nodes with different objectives. In the right child, R1 represents a leaf, and R2 represents an internal node. Each of the internal nodes (L2, L3, R2) produce their objective in two ways. All children Model Set Instances of internal nodes (L2, L3, R2) contain only one tree. Thus, on the left, there are five possible trees, and the right represents three trees.

Our implementation augments the Model Set with two indexes: the **Subproblem Index (SI)** and the **Subproblem-Objective Index (SOI)**. The **Subproblem Index (SI)** is an index from a subproblem to the set of all MSI identifiers for that subproblem, with objectives under a certain value named *scope*. This value helps ensure that we do not extract MSI that are provably not in the Rashomon set using Theorem E.1. The **Subproblem-Objective Index (SOI)** maps from a subproblem/objective pair to an MSI. For example, in Figure 7, SI maps subproblem 1111100000 to identifiers of L1, L2, L3, and SOI maps the identifier of L1 to its metadata.

## B The TreeFARMS Algorithm

In Section 4.2, we presented a condensed version of the extraction algorithm (Algorithm 2); Algorithm 3 presents the full detail.

We maintain global data structures,  $MS$ , the collection of all Model Set Instances in the hierarchical Model Set,  $SI$  the Subproblem Index, and  $SOI$ , the Subproblem-Objective Index as described in Section 4 and Appendix A. They are all initialized to be empty before calling the recursive procedure *extract*, shown below, on the full data set.

Let  $MS_{s,o}$  be the MSI with objective  $o$  for subproblem  $s$ . We implement  $MS_{s,o}$  using the Subproblem-Objective Index,  $SOI$ .

Let  $MS_s$  return a pair consisting of a scope and set of MSI identifiers,  $(scope, msiSet)$ . The scope returned is the objective such that all trees with objective under that value are represented by  $msiSet$  for subproblem  $s$ . The set of MSI identifiers contains all MSI for subproblem  $s$  with objective less than or equal to  $scope$ . We implement  $MS_s$  using the Subproblem Index,  $SI$ .

More formally:

**if**  $scope, \{msiSet\} \in MS_s$  **then**

$scope, \{msiSet\} \in SI[s]$  **and**  $\forall m \text{ in } msiSet, obj(m) \leq scope$

When *extract* returns, the Rashomon Set is represented by  $MS_p$  where  $p$  is the complete data set.

---

**Algorithm 3** *extract*( $G, sub, scope$ )

---

```
// Given a dependency graph,  $G$ , a subproblem,  $sub$ , and a scope,  $scope$ , populate  $MS$  with the
// Rashomon set for  $sub$ .
 $scope', msi\_set' \leftarrow SI[sub]$ 
// When we have solved a problem for a given scope value, we guarantee to have found all possible
// objectives less than or equal to that scope. This line implements SOLVED in Algorithm 2.
if  $scope'$  is not None and  $scope \leq scope'$  then
    // This subproblem is already solved.
    return
 $msi\_set \leftarrow \{\}$ 
 $p \leftarrow G[sub]$  // Find problem  $sub$  in the dependency graph.
 $base\_bound \leftarrow p.obj$  // Objective if this node is a leaf.
if  $base\_bound \leq scope$  then // It is possible for this subproblem to be a leaf
    // Select prediction that minimizes loss for this node. This line and the following implement
    // newLeaf in Algorithm 2.
     $prediction \leftarrow \text{CALCULATE\_PREDICTION}(p)$ 
    // Create single leaf tree represented in an MSI. newMSI constructs an MSI using data
    // provided in its arguments.
     $msi \leftarrow \text{newMSI}(leaf, sub, base\_bound, prediction)$ 
     $msi\_set \leftarrow msi\_set \cup \{msi.identifier\}$ 
     $SOI[sub, base\_bound] \leftarrow msi$ 
// Check all possible features on which we might split.
for each feature  $j \in [1, M]$  do
    // Create subproblems by splitting problem by feature  $j$ .
     $sub_l, sub_r \leftarrow \text{split}(sub, j)$ 
    // If either subproblem is not in dependency graph, we need not consider this split.
    if  $sub_l$  not in  $G$  or  $sub_r$  not in  $G$  then
        continue
     $p_l \leftarrow G[sub_l]$  //  $p_l$  is a node in the dependency graph.
     $p_r \leftarrow G[sub_r]$  //  $p_r$  is a node in the dependency graph.
    if  $p_l.lb + p_r.lb > scope$  then
        continue
    // Populate Model Sets for the left and right subproblems. Recursively call extract and
    // decrement scope using the lower bound of the other side.
     $\text{extract}(G, sub_l, scope - p_r.lb)$ 
     $\text{extract}(G, sub_r, scope - p_l.lb)$ 
    //  $MS$  now contains all Model Sets for the children; find all left and right model set
    // instances.
     $left\_scope, left\_msi\_set \leftarrow SI[sub_l]$ 
    // Remove all MSI whose objectives are too big.
     $left\_msi\_set \leftarrow \{msi \mid msi \in left\_msi\_set \text{ and } obj(msi) \leq scope\}$ 
     $right\_scope, right\_msi\_set \leftarrow SI[sub_r]$ 
     $right\_msi\_set \leftarrow \{msi \mid msi \in right\_msi\_set \text{ and } obj(msi) \leq scope\}$ 
    // For each pair of model set instances in the cross product of left and right, if the sum of
    // their objectives is less than or equal to scope, either create a new Model Set for this
    // problem/objective, or add this pair to an existing Model Set for this problem/objective pair.
    for each pair of model set instances  $(m_l, m_r) \in (left\_msi\_set \times right\_msi\_set)$  do
        // Skip leaf trivial extensions from the output.
        if  $is\_leaf(m_l)$  and  $is\_leaf(m_r)$  and  $m_l.predicts == m_r.predicts$  then
            continue
         $new\_obj \leftarrow m_l.obj + m_r.obj$ 
        if  $new\_obj > scope$  then // Skip combinations that exceed current scope.
            continue
         $msi \leftarrow SOI[sub, new\_obj]$ 
        if not exists  $msi$  then
             $msi \leftarrow \text{newMSI}(\text{internal}, sub, new\_obj)$ 
        // Now, add this left/right pair to the model set for feature  $j$ .
         $msi[j].append(< m_l, m_r >)$ 
         $msi\_set \leftarrow msi\_set \cup \{msi.identifier\}$ 
         $SOI[sub, new\_obj] \leftarrow msi$ 
// We store solved instance should we need it later
 $SI[sub] \leftarrow scope, msi\_set$ 
return
```

---

---

**Algorithm 4** CALCULATE\_PREDICTION( $p$ )  $\rightarrow$  prediction

---

*// Compute the prediction of the given node.*

---

*// Prediction if we end this node as a leaf. Changes to 1 if there are more positives than negatives.*

*prediction*  $\leftarrow 0$

*// Calculate the total positive and negative weights of each equivalence class.*

*//  $s \in \{0, 1\}^n$  is a bitvector indicating datapoints we are considering for this subproblem.*

*$s \leftarrow p.keys$*

*// Compute negatives using samples from only those points captured in this subproblem.*

*negatives*  $\leftarrow \sum_{i=1}^n \mathbb{1}[y_i = 0 \wedge s_i = 1]$

*positives*  $\leftarrow \sum_{i=1}^n \mathbb{1}[y_i = 1 \wedge s_i = 1]$

*// Set the leaf prediction based on class with the higher selected total weight.*

**if** *negatives* < *positives* **then**

*// Leaf predicts the majority class as 1 since positive weights are higher.*

*// Ties are predicted negative w.l.o.g. since the error rate is the same either way.*

*prediction*  $\leftarrow 1$

**return** *prediction*

---

## C Sampling from the Rashomon Set

To facilitate sampling from Rashomon sets too large to materialize in memory, we add a small amount of metadata to our Model Set Representation. Each MSI for a splittable problem retains a count of the total number of trees (unique trees, not MSIs) as well as counts for each entry in the map for the MSI (that is, a count of the number of unique trees attributable to each possible split). Assume that  $count(msi)$  returns the total number of trees represented by an entire Model Set Instance and  $count(msi[j])$  returns the number of trees represented by a particular entry in the map of  $msi$ . Algorithms 5 and 6 present a brute-force algorithm for translating an index value between  $[0, |R_{set}|)$  into a unique tree. To sample a tree, we randomly draw an index from the count of all trees (or the sum of count of all MSIs at the problem set level), and then call Algorithm 5.

---

**Algorithm 5**  $ndx\_to\_tree(MS, ndx) \rightarrow t$ 

---

*// Find the  $ndx^{th}$  tree in the Rashomon set represented by  $MS$*

*// Get all MSI representing the full data set*

*msi\_set, scope*  $\leftarrow MS_p$

**for** *msi* **in** *msi\_set* **do**

**if**  $count(msi) < ndx$  **then**

**break**

*// Align indices to the start of the next MSI*

*ndx*  $\leftarrow ndx - count(msi)$

*// Either  $ndx$  is larger than the size of the Rashomon set or  $msi$  is the Model Set Instance*

*// in which we will find the tree corresponding to  $ndx$ .*

**if**  $ndx \geq count(msi)$  **then**

*// No tree with this  $ndx$  exists.*

**return** NULL

**return**  $ndx\_to\_tree\_in\_msi(msi, ndx)$

---

## D Model Class Reliance of Decision Trees

In this appendix, we present the model class reliance calculation in detail. Given a dataset  $\{\mathbf{x}, \mathbf{y}\}$ , the error of a decision tree  $t$  is defined by a nonnegative loss function  $\ell$ :

$$e_{\text{orig}}(t) := \frac{1}{n} \sum_{i=1}^n \ell(t, \mathbf{y}_{[i]} \mathbf{x}_{[i,k]}, \mathbf{x}_{[i, \setminus k]}), \quad (2)$$

---

**Algorithm 6**  $ndx\_to\_tree\_in\_msi(msi, ndx) \rightarrow t$ 

---

*// Recursive procedure to construct the  $ndx^{th}$  tree in Model Set Instance  $msi$*

**if**  $has\_terminal(msi)$  **then**  
    *// this is a leaf; see if we want to return it, or a more complicated tree (with the same objective).*  
    **if**  $ndx = 0$  **then**  
        **return**  $make\_leaf\_node(msi(prediction))$   
    *// Continue on to a more complicated model, but account for the leaf model.*  
     $ndx \leftarrow ndx - 1$

*// Iterate over features to determine in which feature this index appears.*  
**for**  $f$  **in**  $msi.keys()$  **do**  
    **if**  $count(msi[f]) < ndx$  **then**  
        **break**  
     $ndx \leftarrow ndx - count(msi[f])$

*// At this point,  $f$  is the feature upon which we will split; next we need to find the pair in which  $ndx$  appears.*  
**for each pair** ( $left\_msi, right\_msi$ ) **in**  $msi[f]$  **do**  
     $left\_count \leftarrow count(left\_msi)$   
     $right\_count \leftarrow count(right\_msi)$   
    **if**  $ndx < left\_count \times right\_count$  **then**  
        **break**  
     $ndx \leftarrow ndx - (left\_count \times right\_count)$

*// We now have the precise pair in which we'll find  $ndx$ .*  
 $node \leftarrow make\_internal\_node(f)$   
 $node['true'] \leftarrow ndx\_to\_tree\_in\_msi(left\_msi, ndx // left\_count)$   
 $node['false'] \leftarrow ndx\_to\_tree\_in\_msi(right\_msi, ndx \% left\_count)$   
**return**  $node$

---

where  $\mathbf{x}_{[i,k]}$  is the  $k^{th}$  feature of sample  $i$  and  $\mathbf{x}_{[i,\setminus k]}$  is the set of remaining features. To show how much the accuracy of a fixed tree  $t$  relies on variable  $k$ , we define the permutation loss:

$$e_{\text{divide}}(t) := \frac{1}{2 \lfloor n/2 \rfloor} \sum_{i=1}^{\lfloor n/2 \rfloor} [\ell\{t, (\mathbf{y}_{[i]}, \mathbf{x}_{[i,\setminus k]}, \mathbf{x}_{[i+\lfloor n/2 \rfloor, k]})\} + \ell\{t, (\mathbf{y}_{[i+\lfloor n/2 \rfloor]}, \mathbf{x}_{[i+\lfloor n/2 \rfloor, \setminus k]}, \mathbf{x}_{[i,k]})\}]. \quad (3)$$

We define the model reliance (MR) by division, i.e.,  $MR(t) := (e_{\text{divide}}(t) + \lambda H_t) / (e_{\text{orig}}(t) + \lambda H_t)$ . This definition is slightly different from [51] as we include the leaf penalty term in both numerator and denominator to take tree complexity into consideration. If  $MR(t)$  is large, it means the error went up substantially when feature  $k$  was altered, thus it is important.

MR evaluates how important a feature is for a specific tree  $t$ . However, such an estimation may overestimate or underestimate the feature's general importance. For example, a feature with high model reliance with respect to a tree  $t$  might have low model reliance for another tree  $t'$ . Therefore, we are more interested in how much *any* well-performing model from a decision tree class  $\mathcal{T}$  relies on a feature. Given an  $\epsilon$ -Rashomon set (see Eq (1)), the model class reliance is defined by:

$$[MCR_-, MCR_+] := \left[ \min_{t \in R_{\text{set}}(\epsilon, t_{\text{ref}}, \mathcal{T})} MR(t), \max_{t \in R_{\text{set}}(\epsilon, t_{\text{ref}}, \mathcal{T})} MR(t) \right]. \quad (4)$$

According to [51],  $MCR_-$  is usually easy to calculate as long as the loss function  $\ell$  is convex and there is no leaf penalty term, but  $MCR_+$  is hard to calculate since even if  $\ell$  is convex, the maximization problem is usually non-convex. In the case of trees (or of any discrete functional class with interaction terms), this problem is discrete and certainly nonconvex, and it is hard to compute either  $MCR_-$  or  $MCR_+$  without access to the type of algorithm presented in this work for enumerating the Rashomon set.

## E Theorems and Proofs

We first recall some notation. A leaf set  $t = (l_1, l_2, \dots, l_{H_t})$  contains  $H_t$  distinct leaves, where  $l_i$  is the classification rule of leaf  $i$ . If a leaf is labeled, then  $\hat{y}_i$  is the label prediction for all data in leaf  $i$ . A partially grown tree  $t$  with the leaf set  $t = (l_1, l_2, \dots, l_{H_t})$  could be rewritten as  $t = (t_{\text{fix}}, \delta_{\text{fix}}, t_{\text{split}}, \delta_{\text{split}}, H_t)$ , where  $t_{\text{fix}}$  is a set of fixed leaves that are not permitted to be further split (those leaves will be split in another instance of this tree separately) and  $\delta_{\text{fix}}$  is a set of predicted labels of leaves in  $t_{\text{fix}}$ . Similarly,  $t_{\text{split}}$  is the set of leaves that can be further split and  $\delta_{\text{split}}$  are the predicted labels of leaves  $t_{\text{split}}$ . We denote  $\sigma(t)$  as the set of all  $t$ 's child trees whose fixed leaves contain  $t_{\text{fix}}$ .

**Theorem 3.1** (*Basic Rashomon Lower Bound*) *Let  $\theta_\epsilon$  be the threshold of the Rashomon set. Given a tree  $t = (t_{\text{fix}}, \delta_{\text{fix}}, t_{\text{split}}, \delta_{\text{split}}, H_t)$ , we denote  $b(t_{\text{fix}}, \mathbf{x}, \mathbf{y}) := \ell(t_{\text{fix}}, \mathbf{x}, \mathbf{y}) + \lambda H_t$  as the lower bound of the objective for tree  $t$ . If  $b(t_{\text{fix}}, \mathbf{x}, \mathbf{y}) > \theta_\epsilon$ , then the tree  $t$  and all of its children are not in the  $\epsilon$ -Rashomon set.*

*Proof.* According to the definition of the lower bound for tree  $t$ , we know

$$\text{Obj}(t, \mathbf{x}, \mathbf{y}) = \ell(t, \mathbf{x}, \mathbf{y}) + \lambda H_t \geq \ell(t_{\text{fix}}, \mathbf{x}, \mathbf{y}) + \lambda H_t = b(t_{\text{fix}}, \mathbf{x}, \mathbf{y}).$$

By the same logic, for any child tree  $t' = (t'_{\text{fix}}, \delta'_{\text{fix}}, t'_{\text{split}}, \delta'_{\text{split}}, H_{t'}) \in \sigma(t)$ , we will also have  $\text{Obj}(t', \mathbf{x}, \mathbf{y}) \geq b(t'_{\text{fix}}, \mathbf{x}, \mathbf{y})$ . Since the child trees all have the fixed leaves of the parent,  $t_{\text{fix}} \subseteq t'_{\text{fix}}$ , and they have more leaves,  $H_{t'} \geq H_t$ , we have:

$$b(t'_{\text{fix}}, \mathbf{x}, \mathbf{y}) = \ell(t'_{\text{fix}}, \mathbf{x}, \mathbf{y}) + \lambda H_{t'} \geq \ell(t_{\text{fix}}, \mathbf{x}, \mathbf{y}) + \lambda H_t = b(t_{\text{fix}}, \mathbf{x}, \mathbf{y}).$$

Thus, if  $b(t_{\text{fix}}, \mathbf{x}, \mathbf{y}) > \theta_\epsilon$ , then  $\text{Obj}(t', \mathbf{x}, \mathbf{y}) \geq b(t'_{\text{fix}}, \mathbf{x}, \mathbf{y}) > \theta_\epsilon$ , i.e.,  $t'$  is not in the  $\epsilon$ -Rashomon set.

Therefore, if  $b(t_{\text{fix}}, \mathbf{x}, \mathbf{y}) > \theta_\epsilon$ , we can eliminate the tree  $t$  and its all of children from the search space.  $\square$

We use notation defined in the main text for equivalent points. As a reminder, a set of points is equivalent if they have the same feature values; thus, those points will always receive identical predictions, and hence, some will be misclassified if they have opposite labels.

**Theorem 3.2** (*Rashomon Equivalent Points Bound*) *Let  $\theta_\epsilon$  be the threshold of the Rashomon set. Let  $t$  be a tree with leaves  $t_{\text{fix}}, t_{\text{split}}$  and lower bound  $b(t_{\text{fix}}, \mathbf{x}, \mathbf{y})$ . Let  $b_{\text{equiv}}(t_{\text{split}}, \mathbf{x}, \mathbf{y}) := \frac{1}{n} \sum_{i=1}^n \sum_{u=1}^U \text{cap}(\mathbf{x}_i, t_{\text{split}}) \wedge \mathbb{1}[\mathbf{x}_i \in e_u] \wedge \mathbb{1}[y_i = q_u]$  be the lower bound on the misclassification loss of leaves that can be further split. Let  $B(t, \mathbf{x}, \mathbf{y}) := b(t_{\text{fix}}, \mathbf{x}, \mathbf{y}) + b_{\text{equiv}}(t_{\text{split}}, \mathbf{x}, \mathbf{y})$  be the Rashomon lower bound of  $t$ . If  $B(t, \mathbf{x}, \mathbf{y}) > \theta_\epsilon$ , tree  $t$  and all its children are not in the  $\epsilon$ -Rashomon set.*

*Proof.* According to the definition of  $b(t_{\text{fix}}, \mathbf{x}, \mathbf{y})$  and  $b_{\text{equiv}}(t_{\text{split}}, \mathbf{x}, \mathbf{y})$ , we know

$$\text{Obj}(t, \mathbf{x}, \mathbf{y}) = \ell(t_{\text{fix}}, \mathbf{x}, \mathbf{y}) + \ell(t_{\text{split}}, \mathbf{x}, \mathbf{y}) + \lambda H_t \geq b(t_{\text{fix}}, \mathbf{x}, \mathbf{y}) + b_{\text{equiv}}(t_{\text{split}}, \mathbf{x}, \mathbf{y}) = B(t, \mathbf{x}, \mathbf{y}).$$

For  $t' \in \sigma(t)$ ,  $\text{Obj}(t', \mathbf{x}, \mathbf{y}) \geq b(t_{\text{fix}}, \mathbf{x}, \mathbf{y}) + b_{\text{equiv}}(t_{\text{split}}, \mathbf{x}, \mathbf{y}) = B(t, \mathbf{x}, \mathbf{y})$ . When  $B(t, \mathbf{x}, \mathbf{y}) > \theta_\epsilon$ ,  $\text{Obj}(t, \mathbf{x}, \mathbf{y}) > \theta_\epsilon$  and thus  $\text{Obj}(t', \mathbf{x}, \mathbf{y}) > \theta_\epsilon$ .  $\square$

**Theorem E.1.** (*Rashomon Equivalent Points Bound for Subtrees*) *Let  $t$  be a tree such that the root node is split by a feature, where two subtrees  $t_{\text{left}}$  and  $t_{\text{right}}$  are generated with  $H_{t_{\text{left}}}$  and  $H_{t_{\text{right}}}$  leaves for  $t_{\text{left}}$  and  $t_{\text{right}}$  respectively. Let  $B(t_{\text{left}}, \mathbf{x}, \mathbf{y})$  and  $B(t_{\text{right}}, \mathbf{x}, \mathbf{y})$  be the Rashomon equivalent points bound for the left and right subtrees respectively. (Note that  $B(t_{\text{left}}, \mathbf{x}, \mathbf{y}) \leq \ell(t_{\text{left}}, \mathbf{x}, \mathbf{y}) + \lambda H_{t_{\text{left}}}$  and  $B(t_{\text{right}}, \mathbf{x}, \mathbf{y}) \leq \ell(t_{\text{right}}, \mathbf{x}, \mathbf{y}) + \lambda H_{t_{\text{right}}}$ ). If  $B(t_{\text{left}}, \mathbf{x}, \mathbf{y}) + B(t_{\text{right}}, \mathbf{x}, \mathbf{y}) > \theta_\epsilon$ , then the tree  $t$  is not a member of the  $\epsilon$ -Rashomon set.*

*Proof.*

$$\text{Obj}(t, \mathbf{x}, \mathbf{y}) = \ell(t_{\text{left}}, \mathbf{x}, \mathbf{y}) + \ell(t_{\text{right}}, \mathbf{x}, \mathbf{y}) + \lambda(H_{t_{\text{left}}} + H_{t_{\text{right}}}) \geq B(t_{\text{left}}, \mathbf{x}, \mathbf{y}) + B(t_{\text{right}}, \mathbf{x}, \mathbf{y}).$$

If  $B(t_{\text{left}}, \mathbf{x}, \mathbf{y}) + B(t_{\text{right}}, \mathbf{x}, \mathbf{y}) > \theta_\epsilon$ , then  $\text{Obj}(t, \mathbf{x}, \mathbf{y}) > \theta_\epsilon$ . Therefore, tree  $t$  is not in the  $\epsilon$ -Rashomon set.  $\square$

### Bounds of Accuracy and Balanced Accuracy

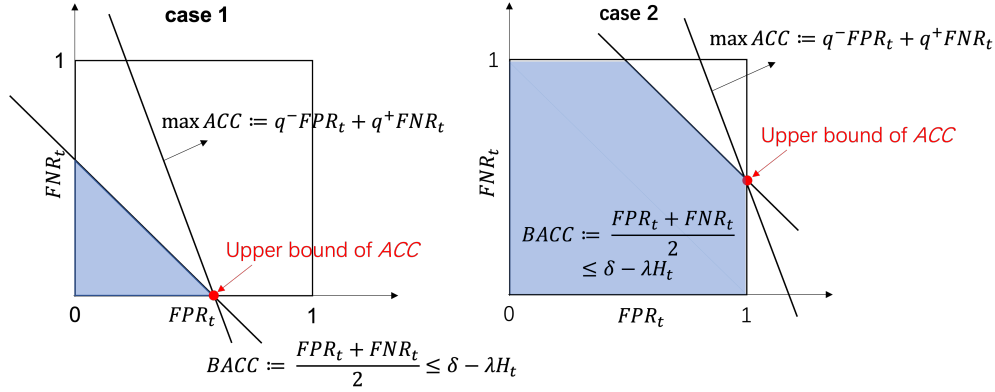

Figure 8: Two cases that can bound the accuracy of tree  $t$ . Note that for a tree  $t$ , its  $FNR_t$  and  $FPR_t$  are in range  $[0, 1]$ . Left: when  $2(\delta - \lambda H_t) < 1$ , the blue area identifies the feasible region. The point that maximize the accuracy is either  $(0, 2(\delta - \lambda H_t))$  or  $(2(\delta - \lambda H_t), 0)$ . Right: when  $2(\delta - \lambda H_t) \geq 1$ , the blue area identifies the feasible region. The point that maximize the accuracy is either  $(2(\delta - \lambda H_t) - 1, 1)$  or  $(1, 2(\delta - \lambda H_t) - 1)$ .

We recall some notations used for Theorem 5.1 and 5.2. Let  $q^+$  be the proportion of positive samples and  $q^-$  be the proportion of negative samples, i.e.,  $q^+ + q^- = 1$ . We denote  $q_{\min} := \min(q^+, q^-)$  and  $q_{\max} := \max(q^+, q^-)$ . Let  $FPR$  and  $FNR$  be the false positive and false negative rates. We notate the Accuracy Rashomon set as  $A_\theta := \{t \in \mathcal{T} : q^- FPR_t + q^+ FNR_t + \lambda H_t \leq \theta\}$ , where  $\theta$  is the objective threshold of the Accuracy Rashomon set, similar to  $\theta_\epsilon$  in Section 3. We denote  $\delta$  in these theorems as the objective threshold of Balanced Accuracy or F1-Score Rashomon sets.

**Theorem 5.1** (Accuracy Rashomon set covers Balanced Accuracy Rashomon set) Let  $B_\delta := \{t \in \mathcal{T} : \frac{FPR_t + FNR_t}{2} + \lambda H_t \leq \delta\}$  be the Balanced Accuracy Rashomon set. If

$$\theta \geq \min\left(2q_{\max}\delta, q_{\max} + (2\delta - 1)q_{\min} + (1 - 2q_{\min})\lambda 2^d\right),$$

where  $d$  is the depth limit, then  $\forall t \in B_\delta, t \in A_\theta$ .

*Proof.* To prove this theorem, we first get the bound values through geometric intuition, and then prove the inequalities formally. Consider the plane with  $FPR$  and  $FNR$  being two axes, shown in Figure 8,  $\forall t \in B_\delta$ , inequalities  $\frac{FPR_t + FNR_t}{2} + \lambda H_t \leq \delta$  and  $0 \leq FPR_t, FNR_t \leq 1$  bound the feasible region. Our goal is to find the upper bound of the accuracy objective in this feasible region, so that when  $\theta$  is greater than this upper bound, we have  $\forall t \in B_\delta, t \in A_\theta$ . As shown in Figure 8 there are two different cases that can bound the accuracy of tree  $t$ .

Case 1:

When  $2(\delta - \lambda H_t) < 1$  (see Figure 8 left), the accuracy loss is a line in the plane and thus maximized at  $(0, 2(\delta - \lambda H_t))$  or  $(2(\delta - \lambda H_t), 0)$ . The corresponding maximum value is  $\max(q^+ \times 2(\delta - \lambda H_t), q^- \times 2(\delta - \lambda H_t)) = q_{\max} 2(\delta - \lambda H_t)$ . Inspired by this geometric intuition, formally we want to show,

$$q^- FPR_t + q^+ FNR_t \leq q_{\max} 2(\delta - \lambda H_t). \quad (5)$$

Eq (5) can be shown as follows,

$$\begin{aligned} q^- FPR_t + q^+ FNR_t &\leq q_{\max}(FPR_t + FNR_t) \quad (q_{\max} \geq q^+, q_{\max} \geq q^-) \\ &\leq q_{\max} 2(\delta - \lambda H_t) \quad (\text{see definition of } B_\delta) \end{aligned} \quad (6)$$



Therefore,

$$\begin{aligned}
q^- FPR_t + q^+ FNR_t + \lambda H_t &\leq q_{\max} 2(\delta - \lambda H_t) + \lambda H_t \\
&= 2q_{\max} \delta - 2q_{\max} \lambda H_t + \lambda H_t \\
&= 2q_{\max} \delta - (2q_{\max} - 1) \lambda H_t \\
&\leq 2q_{\max} \delta \quad (\text{since } q_{\max} \geq 0.5).
\end{aligned} \tag{7}$$

Case 2: Inspired by Figure 8 right. When  $2(\delta - \lambda H_t) \geq 1$ , the the accuracy loss is maximized at either  $(1, 2(\delta - \lambda H_t) - 1)$  or  $(2(\delta - \lambda H_t) - 1, 1)$  on the  $FPR$ - $FNR$  plane, and the corresponding maximum value is  $\max(q^+ \times (2(\delta - \lambda H_t) - 1) + q^-, q^- \times (2(\delta - \lambda H_t) - 1) + q^+) = q_{\max} + (2(\delta - \lambda H_t) - 1)q_{\min}$ . First, we want to show,

$$q^- FPR_t + q^+ FNR_t \leq q_{\max} + (FPR_t + FNR_t - 1)q_{\min}. \tag{8}$$

$$\begin{aligned}
\text{Eq (8) right} - \text{Eq (8) left} &= q_{\max} + (FPR_t + FNR_t - 1)q_{\min} - q^- FPR_t - q^+ FNR_t \\
&= q_{\max} - q_{\min} + q_{\min}(FPR_t + FNR_t) - q^- FPR_t - q^+ FNR_t \\
&= q_{\max} - q_{\min} + (q_{\min} - q^-)FPR_t + (q_{\min} - q^+)FNR_t.
\end{aligned} \tag{9}$$

If  $q^- \geq q^+$ , then  $\text{Eq (9)} = q^- - q^+ + (q^+ - q^-)FPR_t = (q^- - q^+) - (q^- - q^+)FPR_t \geq 0$  since  $q^- - q^+ \geq 0$  and  $1 - FPR_t \geq 0$ . Similarly, if  $q^+ \geq q^-$ , then  $\text{Eq (9)} = (q^+ - q^-) - (q^+ - q^-)FNR_t \geq 0$ . Therefore,  $\text{Eq (9)}$  is always greater than or equal to 0. Hence,  $\text{Eq (8)}$  holds. Therefore,

$$\begin{aligned}
q^- FPR_t + q^+ FNR_t &\leq q_{\max} + (FPR_t + FNR_t - 1)q_{\min} \\
&\leq q_{\max} + (2(\delta - \lambda H_t) - 1)q_{\min} \quad (\text{see definition of } B_\delta),
\end{aligned} \tag{10}$$

which is the same as the maximum value we got intuitively from Figure 8 right. Adding  $\lambda H_t$  to both sides, we have

$$\begin{aligned}
q^- FPR_t + q^+ FNR_t + \lambda H_t &\leq q_{\max} + (2(\delta - \lambda H_t) - 1)q_{\min} + \lambda H_t \\
&= q_{\max} + (2\delta - 1)q_{\min} - 2q_{\min} \lambda H_t + \lambda H_t \\
&= q_{\max} + (2\delta - 1)q_{\min} + (1 - 2q_{\min}) \lambda H_t \\
&\leq q_{\max} + (2\delta - 1)q_{\min} + (1 - 2q_{\min}) \lambda 2^d \quad (\text{if depth is at most } d).
\end{aligned} \tag{11}$$

Combining these two cases,

$$q^- FPR_t + q^+ FNR_t + \lambda H_t \leq \min \left( 2q_{\max} \delta, q_{\max} + (2\delta - 1)q_{\min} + (1 - 2q_{\min}) \lambda 2^d \right). \tag{12}$$

Therefore, if  $\theta \geq \min \left( 2q_{\max} \delta, q_{\max} + (2\delta - 1)q_{\min} + (1 - 2q_{\min}) \lambda 2^d \right)$ , then  $\forall t \in B_\delta, q^- FPR_t + q^+ FNR_t + \lambda H_t \leq \theta$ . In other words,  $\forall t \in B_\delta, t \in A_\theta$ .  $\square$

**Theorem 5.2** (Accuracy Rashomon set covers F1-score Rashomon set) *Let*

$$F_\delta := \left\{ t \in \mathcal{T} : \frac{q^- FPR_t + q^+ FNR_t}{2q^+ + q^- FPR_t - q^+ FNR_t} + \lambda H_t \leq \delta \right\}$$

*be the F1-score Rashomon set. Suppose  $q^+ \in (0, 1)$ ,  $q^- \in (0, 1)$ , and  $\delta - \lambda H_t \in (0, 1)$ . If  $\theta \geq \min \left( \max \left( \frac{2q^+ \delta}{1 - \delta}, \frac{2q^+ (\delta - \lambda 2^d)}{1 - (\delta - \lambda 2^d)} + \lambda 2^d \right), \mathbb{1}[\delta < \sqrt{2} - 1] \frac{2\delta}{1 + \delta} + \mathbb{1}[\delta \geq \sqrt{2} - 1] (\delta + 3 - 2\sqrt{2}) \right)$ , then  $\forall t \in F_\delta, t \in A_\theta$ .*

*Proof.* Similar to Theorem 5.1, we first get the bound values through geometric intuitions, and then prove the inequalities formally. First, we want to represent the F1 loss with  $FPR$  and  $FNR$  so that we can put it in the  $FPR$ - $FNR$  plane. The F1-score is harmonic mean of precision and recall and is

### Bounds of Accuracy and F1 Score

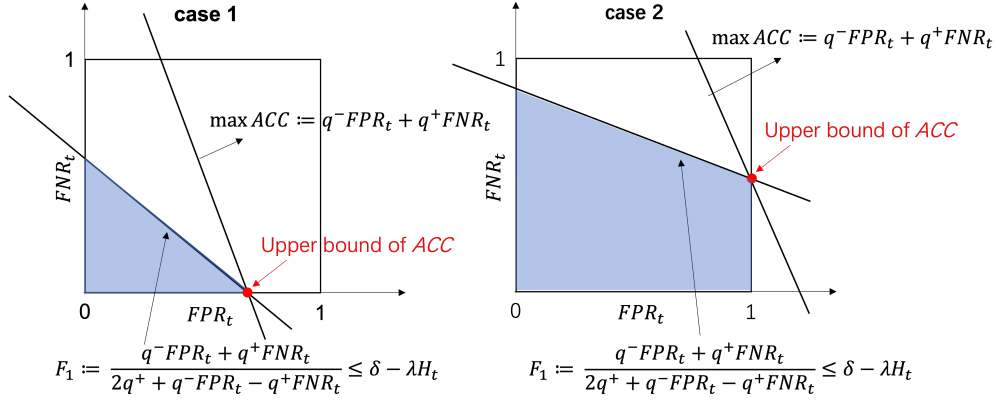

Figure 9: Two cases that can bound the accuracy of tree  $t$ . Note that for a tree  $t$ , its  $FNR_t$  and  $FPR_t$  are in range  $[0, 1]$ . Left: when  $FPR_t < 1$ , the blue area identifies the feasible region. The point that maximize the accuracy is when  $FNR_t = 0$ . Right: when  $FPR_t = 1$ , the blue area identifies the feasible region. The point that maximize the accuracy is when the line intersects the right boundary.

usually written in terms of  $FP$  and  $FN$  as  $1 - \frac{FP+FN}{2N^+ + FP - FN}$ , where  $N^+$  is the number of positive samples. With some operations we can rewrite this formula in terms of  $FPR$  and  $FPN$ ,

$$\begin{aligned} \frac{FP + FN}{2N^+ + FP - FN} &= \frac{(FP + FN)/n}{(2q^+ \times n + FP - FN)/n} \\ &= \frac{\frac{FP}{n} \times \frac{q^-}{q^-} + \frac{FN}{n} \times \frac{q^+}{q^+}}{2q^+ + \frac{FP}{n} \times \frac{q^-}{q^-} - \frac{FN}{n} \times \frac{q^+}{q^+}} \\ &= \frac{q^- FPR + q^+ FNR}{2q^+ + q^- FPR - q^+ FNR} \end{aligned}$$

Here, for simplicity, we use  $f1_t := \frac{q^- FPR_t + q^+ FNR_t}{2q^+ + q^- FPR_t - q^+ FNR_t}$  to denote the F1 loss, which is 1 minus the F1-score of tree  $t$ . Based on the definition of  $F_\delta$ ,  $\forall t \in F_\delta$ , we have

$$\begin{aligned} &\frac{q^- FPR_t + q^+ FNR_t}{2q^+ + q^- FPR_t - q^+ FNR_t} + \lambda H_t \leq \delta \\ \Rightarrow &q^- FPR_t + q^+ FNR_t \leq (\delta - \lambda H_t) \times (2q^+ + q^- FPR_t - q^+ FNR_t) \\ \Rightarrow &q^+ FNR_t (1 + \delta - \lambda H_t) \leq 2q^+ (\delta - \lambda H_t) + q^- (\delta - \lambda H_t - 1) FPR_t \\ \Rightarrow &FNR_t \leq \frac{2(\delta - \lambda H_t)}{1 + \delta - \lambda H_t} + \frac{q^- (\delta - \lambda H_t - 1)}{q^+ (1 + \delta - \lambda H_t)} FPR_t \quad (1 + \delta - \lambda H_t > 1) \end{aligned} \tag{13}$$

This is a line. The slope of the F1-score boundary line is  $\frac{q^- (\delta - \lambda H_t - 1)}{q^+ (1 + \delta - \lambda H_t)}$  and the slope of the accuracy boundary is  $\frac{-q^-}{q^+}$ . Since  $\delta - \lambda H_t \in (0, 1)$ ,  $\frac{\delta - \lambda H_t - 1}{1 + \delta - \lambda H_t} < 0$  and  $|\frac{\delta - \lambda H_t - 1}{1 + \delta - \lambda H_t}| < 1$ . Therefore, both slopes are negative and the slope of F1-score boundary is always larger than the slope of the accuracy boundary (see Figure 9). In addition, we can also show the intercept, which is also the upper bound of  $FNR$  in Eq (13),  $\frac{2(\delta - \lambda H_t)}{1 + \delta - \lambda H_t} < 1$ , since  $\delta - \lambda H_t \in (0, 1)$  and  $\frac{2(\delta - \lambda H_t)}{1 + \delta - \lambda H_t}$  is monotonically increasing with  $\delta - \lambda H_t$ . Therefore,

$$FNR < 1. \tag{14}$$

Since  $0 \leq FPR, FNR \leq 1, \forall t \in F_\delta$ , there are also two different cases that can bound the accuracy of tree  $t$  (see Figure 9).

Case 1: Based on Figure 9 left, when  $FPR_t < 1$ , the point that maximizes the accuracy is when  $FNR_t = 0$ . Using Eq (13), we know the point is  $(\frac{-2q^+(\delta-\lambda H_t)}{q^-(\delta-\lambda H_t-1)}, 0)$ , and the corresponding loss is  $\frac{2q^+(\delta-\lambda H_t)}{1+\lambda H_t-\delta}$ . Formally, we want to show

$$q^- FPR_t + q^+ FNR_t \leq \frac{2q^+(\delta - \lambda H_t)}{1 - (\delta - \lambda H_t)} \quad (15)$$

Eq (15) is shown as follows,

$$q^- FPR_t + q^+ FNR_t \leq \frac{q^- FPR_t + q^+ FNR_t}{1 - FNR_t} \quad (\text{Eq (14), and denominator} \leq 1) \quad (16)$$

$$= \frac{2q^+(q^- FPR_t + q^+ FNR_t)}{2q^+(1 - FNR_t)} \quad (17)$$

$$= \frac{2q^+(q^- FPR_t + q^+ FNR_t)/(2q^+ + q^- FPR_t - q^+ FNR_t)}{(2q^+ - 2q^+ FNR_t)/(2q^+ + q^- FPR_t - q^+ FNR_t)} \quad (18)$$

$$= \frac{2q^+(q^- FPR_t + q^+ FNR_t)/(2q^+ + q^- FPR_t - q^+ FNR_t)}{\frac{2q^+ + q^- FPR_t - q^+ FNR_t - q^- FPR_t - q^+ FNR_t}{2q^+ + q^- FPR_t - q^+ FNR_t}} \quad (19)$$

$$= \frac{2q^+(q^- FPR_t + q^+ FNR_t)/(2q^+ + q^- FPR_t - q^+ FNR_t)}{1 - f1_t} \quad (20)$$

$$= \frac{2q^+ f1_t}{1 - f1_t}. \quad (21)$$

Note that the denominator cannot be 0, because  $FNR < 1$  as shown in Eq (14). Eq (21) is monotonically increasing in  $f1_t$ , since its first derivative is  $\frac{2q^+(1-f1_t)-2q^+f1_t(-1)}{(1-f1_t)^2} = \frac{2q^+}{(1-f1_t)^2} > 0$ . Since  $t \in F_\delta$ , the maximum F1-score is  $\delta - \lambda H_t$ . Therefore,

$$q^- FPR_t + q^+ FNR_t \leq \frac{2q^+ f1_t}{1 - f1_t} \leq \frac{2q^+(\delta - \lambda H_t)}{1 - (\delta - \lambda H_t)}. \quad (22)$$

Adding the leaf penalty on both sides, we get

$$q^- FPR_t + q^+ FNR_t + \lambda H_t \leq \frac{2q^+(\delta - \lambda H_t)}{1 - (\delta - \lambda H_t)} + \lambda H_t. \quad (23)$$

Since  $H_t$  is a variable, for simplicity, we let  $a := \lambda H_t$ . Then we can define  $g(a) := \frac{2q^+(\delta-a)}{1-(\delta-a)} + a$ .

Solving  $g'(a) = \frac{-2q^+}{(1-\delta+a)^2} + 1 = 0$ , we get  $a = \delta - 1 \pm \sqrt{2q^+}$ . Since  $a$  is the leaf penalty,  $a \geq 0$ , we have only one solution for  $a$ . That is,  $a = \delta - 1 + \sqrt{2q^+}$ . Now we consider  $g''(a) = \frac{4q^+(1-\delta+a)}{(1-\delta+a)^4}$ , and, plugging in our solution for  $a$ , we see  $g''(a) \geq 0$ . Therefore,  $g(a)$  achieves the minimum value when  $a = \delta - 1 + \sqrt{2q^+}$ .

If  $0 \leq \delta - 1 + \sqrt{2q^+} \leq \lambda 2^d$ , then for  $a \in [0, \delta - 1 + \sqrt{2q^+}]$ ,  $g'(a) \leq 0$ , indicating  $g(a)$  monotonically decreases in this range, while for  $a \in [\delta - 1 + \sqrt{2q^+}, \lambda 2^d]$ ,  $g'(a) \geq 0$ , indicating  $g(a)$  monotonically increases. Therefore, for  $a \in [0, \lambda 2^d]$ ,  $g(a)$  first increases and then decreases, and thus maximized at the two ends, i.e.,

$$\max g(a) = \max(g(a=0), g(a=\lambda 2^d)) = \max\left(\frac{2q^+\delta}{1-\delta}, \frac{2q^+(\delta-\lambda 2^d)}{1-(\delta-\lambda 2^d)} + \lambda 2^d\right).$$

In summary,

$$q^- FPR_t + q^+ FNR_t + \lambda H_t \leq \max\left(\frac{2q^+\delta}{1-\delta}, \frac{2q^+(\delta-\lambda 2^d)}{1-(\delta-\lambda 2^d)} + \lambda 2^d\right). \quad (24)$$

Case 2: Inspired by Figure 9 right, we can find that the maximizer when  $FPR_t = 1$  at  $(1, \frac{(q^++1)(\delta-\lambda H_t)-q^-}{q^+(1+\delta-\lambda H_t)})$  using Eq (13). And the corresponding loss is  $\frac{2(\delta-\lambda H_t)}{1+\delta-\lambda H_t}$ . Formally, we want to show

$$q^- FPR_t + q^+ FNR_t \leq \frac{2(\delta - \lambda H_t)}{1 + \delta - \lambda H_t}. \quad (25)$$

To show Eq (25),

$$q^- FPR_t + q^+ FNR_t \leq \frac{q^- FPR_t + q^+ FNR_t}{q^+ + q^- FPR_t} (FPR_t \leq 1, \text{denominator} \in (0,1]) \quad (26)$$

$$= \frac{(q^- FPR_t + q^+ FNR_t)/(2q^+ + q^- FPR_t - q^+ FNR_t)}{(q^+ + q^- FPR_t)/(2q^+ + q^- FPR_t - q^+ FNR_t)} \quad (27)$$

$$= \frac{f1_t}{(1 + f1_t)/2} \quad (28)$$

$$= \frac{2f1_t}{1 + f1_t}. \quad (29)$$

Eq (29) is monotonically increasing with  $f1$ , since its derivative  $= \frac{2(1+f1_t)-2f1_t}{(1+f1_t)^2} = \frac{2}{(1+f1_t)^2} \geq 0$ . Moreover, since  $t \in F_\delta$ , the maximum fl-score loss is  $\delta - \lambda H_t$ . Therefore,

$$q^- FPR_t + q^+ FNR_t \leq \frac{2f1_t}{1 + f1_t} \leq \frac{2(\delta - \lambda H_t)}{1 + \delta - \lambda H_t}. \quad (30)$$

Adding leaf penalty to two sides, we can get

$$q^- FPR_t + q^+ FNR_t + \lambda H_t \leq \frac{2(\delta - \lambda H_t)}{1 + \delta - \lambda H_t} + \lambda H_t. \quad (31)$$

Let's change the variable. Let  $a = \lambda H_t$ . Then the right-hand side of Eq (31) is a function of  $a$ . Let  $g(a) := \frac{2(\delta - a)}{1 + \delta - a} + a$ .

$$\frac{dg}{da} = \frac{-2(1 + \delta - a) - 2(\delta - a)(-1)}{(1 + \delta - a)^2} + 1 = \frac{-2}{(1 + \delta - a)^2} + 1 \quad (32)$$

Solving  $\frac{dg}{da} = 0$ , we get

$$a = 1 + \delta \pm \sqrt{2}. \quad (33)$$

Since  $a$  is the leaf penalty term,  $\delta - a > 0$  according to our assumption. If  $a = 1 + \delta + \sqrt{2}$ ,  $\delta - a = -2.414 < 0$  which contradicts the assumption. Therefore, only  $a = 1 + \delta - \sqrt{2}$  could be the valid stationary point. We then calculate  $g''(a) = \frac{-4(1 + \delta - a)}{(1 + \delta - a)^4} \leq 0$ . Therefore,  $a = 1 + \delta - \sqrt{2}$  is the maximizer of  $g(a)$ .

(i) when  $\delta + 1 - \sqrt{2} < 0$ , we still have that  $a$  cannot be smaller than 0. Therefore, the maximum value of  $g(a)$  happens when  $a = 0$ , which is equal to  $\frac{2\delta}{1 + \delta}$ .

(ii) when  $\delta + 1 - \sqrt{2} \geq 0$ , the maximum value of  $g(a)$  is when  $a = \delta + 1 - \sqrt{2}$ , which is equal to  $\delta + 3 - 2\sqrt{2}$ .

In summary,

$$q^- FPR_t + q^+ FNR_t + \lambda H_t \leq \mathbb{1}[\delta < \sqrt{2} - 1] \frac{2\delta}{1 + \delta} + \mathbb{1}[\delta \geq \sqrt{2} - 1](\delta + 3 - 2\sqrt{2}). \quad (34)$$

Combining the two cases together,

$$q^- FPR_t + q^+ FNR_t + \lambda H_t \leq \min \left( \max \left( \frac{2q^+ \delta}{1 - \delta}, \frac{2q^+ (\delta - \lambda 2^d)}{1 - (\delta - \lambda 2^d)} + \lambda 2^d \right), \right. \\ \left. \mathbb{1}[\delta < \sqrt{2} - 1] \frac{2\delta}{1 + \delta} + \mathbb{1}[\delta \geq \sqrt{2} - 1](\delta + 3 - 2\sqrt{2}) \right). \quad (35)$$

Therefore, If  $\theta \geq \min \left( \max \left( \frac{2q^+\delta}{1-\delta}, \frac{2q^+(\delta-\lambda 2^d)}{1-(\delta-\lambda 2^d)} + \lambda 2^d \right), \mathbb{1}[\delta < \sqrt{2} - 1] \frac{2\delta}{1+\delta} + \mathbb{1}[\delta \geq \sqrt{2} - 1](\delta + 3 - 2\sqrt{2}) \right)$ , then  $\forall t \in F_\delta, q^- FPR_t + q^+ FNR_t + \lambda H_t \leq \theta$ . In other words,  $\forall t \in F_\delta, t \in A_\theta$ .  $\square$

Recall notation for Theorem 5.3 and 5.4. Let  $\tilde{t}^*$  be the optimal tree trained on  $\{\mathbf{x}_{[\setminus K, \cdot]}, \mathbf{y}_{[\setminus K]}\}$  where  $K$  is a set of indices of instances that we wish to analyze. We denote  $|K|$  as the cardinality of the set  $K$ . Overloading notation to include the dataset, let  $R_{set}(\epsilon, t^*, \mathcal{T}, \mathbf{x}, \mathbf{y}) = R_{set}(\epsilon, t^*, \mathcal{T})$  (see Eq (1)) be the Rashomon set of the original dataset, where  $t_{\text{ref}} = t^*$  is the optimal tree trained on the original dataset, and we define the  $\epsilon'$ -Rashomon set on the reduced dataset as

$$R_{set}(\epsilon', \tilde{t}^*, \mathcal{T}, \mathbf{x}_{[\setminus K, \cdot]}, \mathbf{y}_{[\setminus K]}) := \{t \in \mathcal{T} : \text{Obj}(t, \mathbf{x}_{[\setminus K, \cdot]}, \mathbf{y}_{[\setminus K]}) \leq (1 + \epsilon') \times \text{Obj}(\tilde{t}^*, \mathbf{x}_{[\setminus K, \cdot]}, \mathbf{y}_{[\setminus K]})\}.$$

**Theorem 5.3** (Optimal tree after removing a group of instances is still in full-dataset Rashomon set)

If  $\epsilon \geq \frac{2|K|}{n \times \text{Obj}(t^*, \mathbf{x}, \mathbf{y})}$ ,  $\tilde{t}^* \in R_{set}(\epsilon, t^*, \mathcal{T}, \mathbf{x}, \mathbf{y})$ .

*Proof.* The objective of  $t^*$  on the original dataset and the reduced dataset are

$$\text{Obj}(t^*, \mathbf{x}, \mathbf{y}) = \frac{1}{n} \sum_{i=1}^n \mathbb{1}[y_i \neq \hat{y}_i^{t^*}] + \lambda H_{t^*} \text{ and } \text{Obj}(t^*, \mathbf{x}_{[\setminus K, \cdot]}, \mathbf{y}_{[\setminus K]}) = \frac{1}{n - |K|} \sum_{i \notin K} \mathbb{1}[y_i \neq \hat{y}_i^{t^*}] + \lambda H_{t^*}.$$

Similarly, the objective of  $\tilde{t}^*$  on the original dataset and the reduced dataset are

$$\text{Obj}(\tilde{t}^*, \mathbf{x}, \mathbf{y}) = \frac{1}{n} \sum_{i=1}^n \mathbb{1}[y_i \neq \hat{y}_i^{\tilde{t}^*}] + \lambda H_{\tilde{t}^*} \text{ and } \text{Obj}(\tilde{t}^*, \mathbf{x}_{[\setminus K, \cdot]}, \mathbf{y}_{[\setminus K]}) = \frac{1}{n - |K|} \sum_{i \notin K} \mathbb{1}[y_i \neq \hat{y}_i^{\tilde{t}^*}] + \lambda H_{\tilde{t}^*}.$$

Since  $\tilde{t}^*$  is the optimal tree trained on  $\{\mathbf{x}_{[\setminus K, \cdot]}, \mathbf{y}_{[\setminus K]}\}$ ,

$$\text{Obj}(\tilde{t}^*, \mathbf{x}_{[\setminus K, \cdot]}, \mathbf{y}_{[\setminus K]}) \leq \text{Obj}(t^*, \mathbf{x}_{[\setminus K, \cdot]}, \mathbf{y}_{[\setminus K]}). \quad (36)$$

Step 1: bound the difference between  $\text{Obj}(t^*, \mathbf{x}, \mathbf{y})$  and  $\text{Obj}(t^*, \mathbf{x}_{[\setminus K, \cdot]}, \mathbf{y}_{[\setminus K]})$

Since  $\sum_{i=1}^n \mathbb{1}[y_i \neq \hat{y}_i^{t^*}] = \sum_{i \notin K} \mathbb{1}[y_i \neq \hat{y}_i^{t^*}] + \sum_{i \in K} \mathbb{1}[y_i \neq \hat{y}_i^{t^*}]$ , we can get

$$\begin{aligned} \text{Obj}(t^*, \mathbf{x}, \mathbf{y}) - \text{Obj}(t^*, \mathbf{x}_{[\setminus K, \cdot]}, \mathbf{y}_{[\setminus K]}) &= \frac{1}{n} \sum_{i=1}^n \mathbb{1}[y_i \neq \hat{y}_i^{t^*}] - \frac{1}{n - |K|} \sum_{i \notin K} \mathbb{1}[y_i \neq \hat{y}_i^{t^*}] \\ &= \frac{1}{n} \left( \sum_{i \notin K} \mathbb{1}[y_i \neq \hat{y}_i^{t^*}] + \sum_{i \in K} \mathbb{1}[y_i \neq \hat{y}_i^{t^*}] \right) - \frac{1}{n - |K|} \sum_{i \notin K} \mathbb{1}[y_i \neq \hat{y}_i^{t^*}] \\ &= \frac{(n - |K|) \sum_{i \notin K} \mathbb{1}[y_i \neq \hat{y}_i^{t^*}] + (n - |K|) \sum_{i \in K} \mathbb{1}[y_i \neq \hat{y}_i^{t^*}]}{n(n - |K|)} \\ &\quad - \frac{n \sum_{i \notin K} \mathbb{1}[y_i \neq \hat{y}_i^{t^*}]}{n(n - |K|)} \\ &= \frac{(n - |K|) \sum_{i \in K} \mathbb{1}[y_i \neq \hat{y}_i^{t^*}] - |K| \times \sum_{i \notin K} \mathbb{1}[y_i \neq \hat{y}_i^{t^*}]}{n(n - |K|)}. \end{aligned} \quad (37)$$

Since  $\sum_{i \in K} \mathbb{1}[y_i \neq \hat{y}_i^{t^*}] \in \{0, 1, \dots, |K|\}$ ,

$$(n - |K|) \sum_{i \in K} \mathbb{1}[y_i \neq \hat{y}_i^{t^*}] \in \{0, n - |K|, \dots, (n - |K|)|K|\}.$$

Similarly,  $\sum_{i \notin K} \mathbb{1}[y_i \neq \hat{y}_i^{t^*}] \in \{0, 1, \dots, n - |K|\}$ , therefore,

$$|K| \sum_{i \notin K} \mathbb{1}[y_i \neq \hat{y}_i^{t^*}] \in \{0, |K|, \dots, |K|(n - |K|)\}.$$

Combining the extreme values of these two terms together, we know Eq (37) is

$$Obj(t^*, \mathbf{x}, \mathbf{y}) - Obj(t^*, \mathbf{x}_{[\setminus K, \cdot]}, \mathbf{y}_{[\setminus K]}) \geq \frac{-|K|}{n}. \quad (38)$$

Step 2: bound the difference between  $Obj(\tilde{t}^*, \mathbf{x}_{[\setminus K, \cdot]}, \mathbf{y}_{[\setminus K]})$  and  $Obj(\tilde{t}^*, \mathbf{x}, \mathbf{y})$ .

$$\begin{aligned} Obj(\tilde{t}^*, \mathbf{x}_{[\setminus K, \cdot]}, \mathbf{y}_{[\setminus K]}) - Obj(\tilde{t}^*, \mathbf{x}, \mathbf{y}) &= \frac{1}{n - |K|} \sum_{i \notin K} \mathbb{1}[y_i \neq \hat{y}_i^{\tilde{t}^*}] - \frac{1}{n} \sum_{i=1}^n \mathbb{1}[y_i \neq \hat{y}_i^{\tilde{t}^*}] \\ &= \frac{1}{n - |K|} \sum_{i \notin K} \mathbb{1}[y_i \neq \hat{y}_i^{\tilde{t}^*}] - \frac{1}{n} \left[ \sum_{i \in K} \mathbb{1}[y_i \neq \hat{y}_i^{\tilde{t}^*}] + \sum_{i \notin K} \mathbb{1}[y_i \neq \hat{y}_i^{\tilde{t}^*}] \right] \\ &= \frac{n \sum_{i \notin K} \mathbb{1}[y_i \neq \hat{y}_i^{\tilde{t}^*}]}{(n - |K|)n} \\ &\quad - \frac{(n - |K|)(\sum_{i \in K} \mathbb{1}[y_i \neq \hat{y}_i^{\tilde{t}^*}] + \sum_{i \notin K} \mathbb{1}[y_i \neq \hat{y}_i^{\tilde{t}^*}])}{n(n - |K|)} \\ &= \frac{|K| \sum_{i \notin K} \mathbb{1}[y_i \neq \hat{y}_i^{\tilde{t}^*}] - (n - |K|) \sum_{i \in K} \mathbb{1}[y_i \neq \hat{y}_i^{\tilde{t}^*}]}{n(n - |K|)}. \end{aligned} \quad (39)$$

Since  $\sum_{i \notin K} \mathbb{1}[y_i \neq \hat{y}_i^{\tilde{t}^*}] \in \{0, 1, \dots, n - |K|\}$ ,

$$|K| \sum_{i \notin K} \mathbb{1}[y_i \neq \hat{y}_i^{\tilde{t}^*}] \in \{0, |K|, \dots, |K|(n - |K|)\}.$$

Similarly,  $\sum_{i \in K} \mathbb{1}[y_i \neq \hat{y}_i^{\tilde{t}^*}] \in \{0, 1, \dots, |K|\}$ ,

$$(n - |K|) \sum_{i \in K} \mathbb{1}[y_i \neq \hat{y}_i^{\tilde{t}^*}] \in \{0, n - |K|, \dots, |K|(n - |K|)\}.$$

Combining the extreme values of these two terms, we know Eq (39) obeys

$$Obj(\tilde{t}^*, \mathbf{x}_{[\setminus K, \cdot]}, \mathbf{y}_{[\setminus K]}) - Obj(\tilde{t}^*, \mathbf{x}, \mathbf{y}) \geq \frac{-|K|}{n}. \quad (40)$$

Given Eq (36), (38), (40), we can get

$$\begin{aligned} Obj(t^*, \mathbf{x}, \mathbf{y}) &\geq Obj(t^*, \mathbf{x}_{[\setminus K, \cdot]}, \mathbf{y}_{[\setminus K]}) + \frac{-|K|}{n} \quad (\text{see Eq (38)}) \\ &\geq Obj(\tilde{t}^*, \mathbf{x}_{[\setminus K, \cdot]}, \mathbf{y}_{[\setminus K]}) + \frac{-|K|}{n} \quad (\text{see Eq (36)}) \\ &\geq Obj(\tilde{t}^*, \mathbf{x}, \mathbf{y}) + \frac{-2|K|}{n} \quad (\text{see Eq (40)}). \end{aligned} \quad (41)$$

In other words,  $Obj(\tilde{t}^*, \mathbf{x}, \mathbf{y}) \leq Obj(t^*, \mathbf{x}, \mathbf{y}) + \frac{2|K|}{n}$ . To guarantee that  $Rset(\epsilon, t^*, \mathcal{T}, \mathbf{x}, \mathbf{y})$  covers  $\tilde{t}^*$ , i.e.,  $Obj(t^*, \mathbf{x}, \mathbf{y}) + \frac{2|K|}{n} \leq (1 + \epsilon) \times Obj(t^*, \mathbf{x}, \mathbf{y})$ , we impose that  $\epsilon \geq \frac{2|K|}{n \times Obj(t^*, \mathbf{x}, \mathbf{y})}$ .  $\square$

**Theorem 5.4** (Rashomon set after removing a group of instances is within full-dataset Rashomon set) *If  $\epsilon \geq \epsilon' + \frac{(2+\epsilon')|K|}{n \times Obj(t^*, \mathbf{x}, \mathbf{y})}$ , then  $\forall t \in R_{\text{set}}(\epsilon', \tilde{t}^*, \mathcal{T}, \mathbf{x}_{[\setminus K, \cdot]}, \mathbf{y}_{[\setminus K]})$ , we have  $t \in R_{\text{set}}(\epsilon, t^*, \mathcal{T}, \mathbf{x}, \mathbf{y})$ .*

*Proof.* Given a decision tree  $t \in R_{\text{set}}(\epsilon', \tilde{t}^*, \mathcal{T}, \mathbf{x}_{[\setminus K, \cdot]}, \mathbf{y}_{[\setminus K]})$ , we know

$$\begin{aligned} Obj(t, \mathbf{x}_{[\setminus K, \cdot]}, \mathbf{y}_{[\setminus K]}) &\leq (1 + \epsilon') \times Obj(\tilde{t}^*, \mathbf{x}_{[\setminus K, \cdot]}, \mathbf{y}_{[\setminus K]}) \\ &\leq (1 + \epsilon') \times Obj(t^*, \mathbf{x}_{[\setminus K, \cdot]}, \mathbf{y}_{[\setminus K]}) \quad (\tilde{t}^* \text{ is the optimal tree on } \{\mathbf{x}_{[\setminus K, \cdot]}, \mathbf{y}_{[\setminus K]}\}) \\ &\leq (1 + \epsilon') \times \left[ Obj(t^*, \mathbf{x}, \mathbf{y}) + \frac{|K|}{n} \right] \quad (\text{see Eq (38)}). \end{aligned} \quad (42)$$

Then we bound the difference between  $Obj(t, \mathbf{x}_{[\setminus K, \cdot]}, \mathbf{y}_{[\setminus K]})$  and  $Obj(t, \mathbf{x}, \mathbf{y})$ .

$$\begin{aligned}
Obj(t, \mathbf{x}_{[\setminus K, \cdot]}, \mathbf{y}_{[\setminus K]}) - Obj(t, \mathbf{x}, \mathbf{y}) &= \frac{1}{n - |K|} \sum_{i \notin K} \mathbb{1}[y_i \neq \hat{y}_i^t] - \frac{1}{n} \sum_{i=1}^n \mathbb{1}[y_i \neq \hat{y}_i^t] \\
&= \frac{1}{n - |K|} \sum_{i \notin K} \mathbb{1}[y_i \neq \hat{y}_i^t] - \frac{1}{n} \left[ \sum_{i \in K} \mathbb{1}[y_i \neq \hat{y}_i^t] + \sum_{i \notin K} \mathbb{1}[y_i \neq \hat{y}_i^t] \right] \\
&= \frac{n \sum_{i \notin K} \mathbb{1}[y_i \neq \hat{y}_i^t] - (n - |K|) \sum_{i \notin K} \mathbb{1}[y_i \neq \hat{y}_i^t]}{(n - |K|)n} \\
&\quad - \frac{(n - |K|)(\sum_{i \in K} \mathbb{1}[y_i \neq \hat{y}_i^t])}{n(n - |K|)} \\
&= \frac{|K| \sum_{i \notin K} \mathbb{1}[y_i \neq \hat{y}_i^t] - (n - |K|) \sum_{i \in K} \mathbb{1}[y_i \neq \hat{y}_i^t]}{n(n - |K|)}.
\end{aligned} \tag{43}$$

Since  $\sum_{i \notin K} \mathbb{1}[y_i \neq \hat{y}_i^t] \in \{0, 1, \dots, n - |K|\}$ ,

$$|K| \sum_{i \notin K} \mathbb{1}[y_i \neq \hat{y}_i^t] \in \{0, |K|, \dots, |K|(n - |K|)\}.$$

Similarly,  $\sum_{i \in K} \mathbb{1}[y_i \neq \hat{y}_i^t] \in \{0, 1, \dots, |K|\}$ ,

$$(n - |K|) \sum_{i \in K} \mathbb{1}[y_i \neq \hat{y}_i^t] \in \{0, n - |K|, \dots, |K|(n - |K|)\}.$$

Combining the extreme values of these two terms we know Eq (43) obeys

$$Obj(t, \mathbf{x}_{[\setminus K, \cdot]}, \mathbf{y}_{[\setminus K]}) - Obj(t, \mathbf{x}, \mathbf{y}) \geq \frac{-|K|}{n}. \tag{44}$$

Combining Eq (42) and (44), we get

$$\begin{aligned}
Obj(t, \mathbf{x}, \mathbf{y}) &\leq Obj(t, \mathbf{x}_{[\setminus K, \cdot]}, \mathbf{y}_{[\setminus K]}) + \frac{|K|}{n} \quad (\text{see Eq 44}) \\
&\leq (1 + \epsilon') \times \left[ Obj(t^*, \mathbf{x}, \mathbf{y}) + \frac{|K|}{n} \right] + \frac{|K|}{n} \quad (\text{see Eq (42)}) \\
&= (1 + \epsilon') \times Obj(t^*, \mathbf{x}, \mathbf{y}) + \frac{(2 + \epsilon')|K|}{n}.
\end{aligned} \tag{45}$$

Thus, when  $\epsilon \geq \epsilon' + \frac{(2 + \epsilon')|K|}{n \times Obj(t^*, \mathbf{x}, \mathbf{y})}$ , Eq (45) extends to

$$\begin{aligned}
Obj(t, \mathbf{x}, \mathbf{y}) &\leq (1 + \epsilon') \times Obj(t^*, \mathbf{x}, \mathbf{y}) + \frac{(2 + \epsilon')|K|}{n} \\
&\leq (1 + \epsilon') \times Obj(t^*, \mathbf{x}, \mathbf{y}) + (\epsilon - \epsilon') \times Obj(t^*, \mathbf{x}, \mathbf{y}) \\
&= (1 + \epsilon) \times Obj(t^*, \mathbf{x}, \mathbf{y}).
\end{aligned} \tag{46}$$

In other words, when  $\epsilon \geq \epsilon' + \frac{(2 + \epsilon')|K|}{n \times Obj(t^*, \mathbf{x}, \mathbf{y})}$ ,  $\forall t \in R_{set}(\epsilon', \tilde{t}^*, \mathcal{T}, \mathbf{x}_{[\setminus K, \cdot]}, \mathbf{y}_{[\setminus K]})$ ,  $t \in R_{set}(\epsilon, t^*, \mathcal{T}, \mathbf{x}, \mathbf{y})$ .

□

## F Experimental Datasets

We present results for 14 datasets: four from the UCI Machine Learning Repository [52] (Car Evaluation, Congressional Voting Records, Monk2, Iris, and Breast Cancer), a penguin dataset [53], a recidivism dataset (COMPAS) [54], the Fair Isaac (FICO) credit risk dataset [55] used for the Explainable ML Challenge, and four coupon datasets (Bar, Coffee House, Takeaway Food, Cheap

Restaurant, and Expensive Restaurant), which were collected on Amazon Mechanical Turk via a survey [56]. We predict which individuals are arrested within two years of release on the COMPAS dataset, whether an individual will default on a loan for the FICO dataset, and whether a customer will accept a coupon for takeaway food or a cheap restaurant depending on their coupon usage history, current conditions while driving, and coupon expiration time on two coupon datasets. All the datasets are publicly available.

## F.1 Preprocessing

Table 1 summarizes all the datasets after preprocessing.

| Dataset                      | Samples | Binary Features |
|------------------------------|---------|-----------------|
| Car Evaluation               | 1728    | 15              |
| Congressional Voting Records | 435     | 32              |
| Monk2                        | 169     | 11              |
| Penguin                      | 333     | 13              |
| Iris                         | 151     | 15              |
| Breast Cancer                | 699     | 10              |
| COMPAS                       | 6907    | 12              |
| FICO                         | 10459   | 17              |
| Bar-7                        | 1913    | 14              |
| Bar                          | 1913    | 15              |
| Coffee House                 | 3816    | 15              |
| Takeaway Food                | 2280    | 15              |
| Cheap Restaurant             | 2653    | 15              |
| Expensive Restaurant         | 1417    | 15              |

Table 1: Preprocessed datasets

**Car Evaluation, Congressional Voting Records, Monk2, Penguin:** We preprocess these datasets, which contain only categorical features, using one-hot encoding.

**Iris:** We select thresholds produced by splitting each numerical feature into three equal parts. We used an implementation of qcut in Pandas [57] to split features. This yields 15 features.

**Breast Cancer:** We select features and thresholds that are used by a gradient boosted tree with 40 decision stumps, which are “Clump\_Thickness = 10”, “Uniformity\_Cell\_Size=1”, “Uniformity\_Cell\_Size=10”, “Uniformity\_Cell\_Shape=1”, “Marginal\_Adhesion=1”, “Single\_Epithelial\_Cell\_Size=2”, “Bare\_Nuclei=1”, “Bare\_Nuclei=10”, “Normal\_Nucleoli=1”, “Normal\_Nucleoli=10”.

**COMPAS:** We use the same discretized binary features of COMPAS produced in [58], which are the following: “sex = Female”, “age < 21”, “age < 23”, “age < 26”, “age < 46”, “juvenile felonies = 0”, “juvenile misdemeanors = 0”, “juvenile crimes = 0”, “priors = 0”, “priors = 1”, “priors = 2 to 3”, “priors > 3”.

**FICO:** We use the same discretized binary features of FICO produced in [58], which are the following: “External Risk Estimate < 0.49”, “External Risk Estimate < 0.65”, “External Risk Estimate < 0.80”, “Number of Satisfactory Trades < 0.5”, “Trade Open Time < 0.6”, “Trade Open Time < 0.85”, “Trade Frequency < 0.45”, “Trade Frequency < 0.6”, “Delinquency < 0.55”, “Delinquency < 0.75”, “Installment < 0.5”, “Installment < 0.7”, “Inquiry < 0.75”, “Revolving Balance < 0.4”, “Revolving Balance < 0.6”, “Utilization < 0.6”, “Trade W. Balance < 0.33”.

**Bar, Coffee House, Takeaway Food, Cheap Restaurant, Expensive Restaurant:** We selected features “destination”, “passanger”, “weather”, “temperature”, “time”, “expiration”, “gender”, “age”, “maritalStatus”, “childrenNumber”, “education”, “occupation”, “income”, “Bar”, “Coffee-House”, “CarryAway”, “RestaurantLessThan20”, “Restaurant20To50”, “toCouponGEQ15min”, “toCouponGEQ25min”, “directionSame” and the label Y, and removed observations with missing values. We used one-hot encoding to transform these categorical features into binary features. We then selected 15 binary features with the highest variable importance value trained using gradient boosted trees with 100 max-depth 3 weak classifiers.



- **Bar:** The selected binary features are “Bar = 1 to 3”, “Bar = 4 to 8”, “Bar = less1”, “maritalStatus = Single”, “childrenNumber = 0”, “Bar = gt8”, “passanger = Friend(s)”, “time = 6PM”, “passanger = Kid(s)”, “CarryAway = 4 to 8”, “gender = Female”, “education = Graduate degree (Masters Doctorate etc.)”, “Restaurant20To50 = 4 to 8”, “expiration = 1d”, “temperature = 55”.
- **Coffee House:** The selected binary features are “CoffeeHouse = 1 to 3”, “CoffeeHouse = 4 to 8”, “CoffeeHouse = gt8”, “CoffeeHouse = less1”, “expiration = 1d”, “destination = No Urgent Place”, “time = 10AM”, “direction = same”, “destination = Home”, “toCoupon = GEQ15min”, “Restaurant20To50 = gt8”, “education = Bachelors degree”, “time = 10PM”, “income = \$75000 - \$87499”, “passanger = Friend(s)”.
- **Takeaway Food:** The selected binary features are “expiration = 1d”, “time = 6PM”, “CoffeeHouse = gt8”, “education = Graduate degree”, “weather = Rainy”, “maritalStatus = Single”, “time = 2PM”, “occupation = Student”, “income = \$62500-\$74999”, “occupation = Legal”, “occupation = Installation Maintenance & Repair”, “direction = same”, “destination = No Urgent Place”, “income = \$100000 or more”, “Bar = less1”.
- **Cheap Restaurant:** The selected binary features are “toCoupon = GEQ25min”, “expiration = 1d”, “time = 6PM”, “destination = No Urgent Place”, “time = 10PM”, “CarryAway = less1”, “passanger = Kid(s)”, “weather = Snowy”, “passanger = Alone”, “income = \$87500 - \$99999”, “occupation = Retired”, “CoffeeHouse = gt8”, “age = 36”, “weather = Rainy”, “direction = same”.
- **Expensive Restaurant:** The selected binary features are “expiration = 1d”, “CoffeeHouse = 1 to 3”, “Restaurant20To50 = 4 to 8”, “Restaurant20To50 = 1 to 3”, “occupation = Office & Administrative Support”, “age = 31”, “Restaurant20To50 = gt8”, “income = \$12500 - \$24999”, “toCoupon = GEQ15min”, “occupation = Computer & Mathematical”, “time = 10PM”, “CoffeeHouse = 4 to 8”, “income = \$50000 - \$62499”, “passanger = Alone”, “destination = No Urgent Place”.

**Bar-7:** We use the same discretized binary features of Bar-7 produced in [59], which are the following: “passanger = Kids”, “age = 21”, “age = 26”, “age = 31”, “age = 36”, “age = 41”, “age = 46”, “age = 26”, “age = 50plus”, “Bar = 1 to 3”, “Bar = 4 to 8”, “Bar = gt8”, “Bar = less1”, “Restaurant20to50  $\geq 4$ ”, “direction = same”.

## G More Experimental Results

### G.1 Scalability and Efficiency of Calculating Rashomon set with TreeFARMS versus Baselines

**Collection and Setup:** We ran this experiment on 10 datasets: **Monk2, COMPAS, Car Evaluation, FICO, Congressional Voting Records, Bar, Bar7, Coffee House, Cheap Restaurant, Expensive Restaurant**. To run TreeFARMS, we set  $\lambda$  to 0.01 for Monk2, COMPAS, FICO, Congressional Voting Records, Bar, Bar7, Coffee House and Expensive Restaurant and to 0.005 for Car Evaluation and Cheap Restaurant. These choices yielded sufficiently larger Rashomon sets. We set  $\epsilon$  to 0.15 for Congressional Voting Records and 0.10 for all other datasets. This means we store all models within 10% of the optimal solution.

We used the R package BART [60] and set the number of trees in each iteration to 1. We sampled models from the posterior with 10-iteration intervals between draws. To get sparser models, we used a sparse Dirichlet prior. To get a set of trees from Random Forest and CART, we used RandomForestClassifier from scikit-learn [61] and set min\_samples\_split to  $\max(\lceil 2n\lambda \rceil, 2)$ , min\_samples\_leaf to  $\lceil n\lambda \rceil$ , and max\_leaf\_nodes to  $\lceil 1/(2\lambda) \rceil$ . We set max\_features to “auto” for Random Forest and “None” for CART. For GOSDT, we sampled 75% of the dataset size, with replacement to improve diversity, and fit an optimal tree on the sampled data. To improve performance for BART, Random Forest, and CART with sampling, we collapsed trivial splits (nodes that have two leaves with the same predicted label) into a single node. We record the time used to construct the Rashomon set and ran the baselines for a similar time to sample trees. Thus, all methods were given the same amount of time to produce good trees. For each dataset and baseline method, we used 5 different random seeds to compute the average and standard deviation of number of trees found in Rashomon set and run time. We did not

report errors on TreeFARMS as it is deterministic. We used results obtained from the first random seed to generate Figure 10.

We ran this experiment on a 2.7Ghz (768GB RAM 48 cores) Intel Xeon Gold 6226 processor. We set a 200-GB memory limit.

**Results:** Figure 10 compares the Rashomon set with the four baselines on the Car Evaluation, Coffee House, Cheap and Expensive Restaurant datasets. Similar to the patterns shown in Figure 1, the four subfigures on the top show that TreeFARMS (in purple) found *many more distinct trees in the Rashomon set* than any of the four baselines on all of the datasets. The baseline methods tend to find many duplicated trees, and most trees found by the baselines have objective values higher than the threshold of the Rashomon set, and thus, are not in the Rashomon set. The four subfigures on the bottom show the distribution of objective values of trees from each method. We note that in the method GOSDT with sampling the optimal tree for a given subsample of the dataset might not be identical to the optimal tree to the original dataset. Thus, GOSDT, which finds provably optimal trees for a given dataset, does not obtain many distinct trees that are in the Rashomon set: instead, many subsamples produce either the same optimal solutions or trees that are outside of the full dataset’s Rashomon set, which is why its curve is not visible. TreeFARMS is the only method *guaranteed* to find all trees in the Rashomon set.

Table 2 shows that TreeFARMS finds *more trees in the Rashomon set per second* than all other baselines on all the datasets.

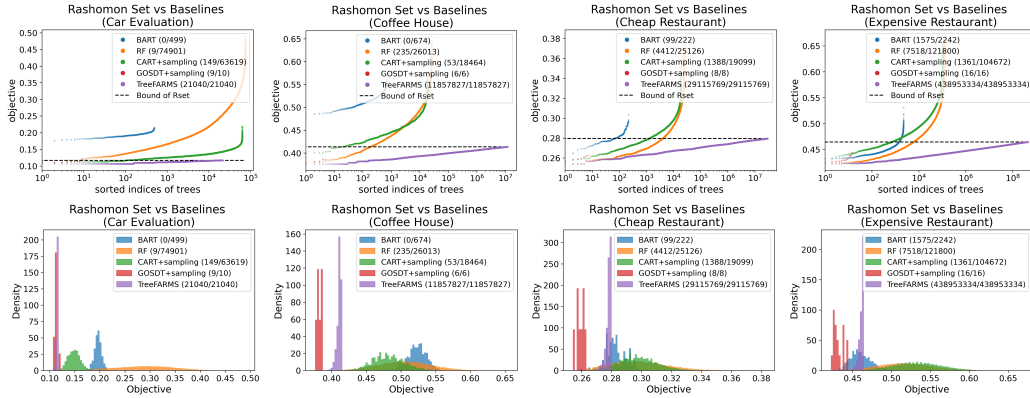

Figure 10: Comparison of trees in the Rashomon set and trees generated by baselines. (A/B) in the legend indicates that A trees of the B trees produced by the baseline method are in the Rashomon set. For example, GOSDT+sampling (9/10) means that 9 trees of 10 distinct trees found by GOSDT with sampling are in the Rashomon set.

## G.2 Landscape of the Rashomon set

**Collection and Setup:** We ran this experiment on **Monk2**. We used dimension reduction techniques to visualize the Rashomon set.

We first generated the Rashomon set with  $\lambda = 0.025$  and  $\epsilon = 0.2$ . We then selected the best tree for each unique set of features in the Rashomon set; that is, if two trees used the same features, we kept the tree with the better objective. Next, we reduced the Rashomon set to  $\mathbb{R}^2$  using the PaCMAP dimension reduction technique [which handles global structure better than techniques such as t-SNE and UMAP, see 62].

**Results:** Figure 11 shows the embedding using three different distance metrics: tree edit distance (a), prediction set distance (b), and feature set distance (c). The *tree edit distance* is the edit distance between two trees using the operations add-node, delete-node, or swap-nodes, all with equal weight. The *prediction set distance* is the Hamming distance between the set of predictions each tree creates for the dataset (up to  $n$ ). The *feature set distance* between two trees is the Hamming distance between the feature sets they used (up to  $p$ ).

|                              | TreeFARMS |                    | BART               |                    | RF                 |                     | CART + sampling    |                     | GOSDT + sampling   |                    |
|------------------------------|-----------|--------------------|--------------------|--------------------|--------------------|---------------------|--------------------|---------------------|--------------------|--------------------|
|                              | time (s)  | # trees in Rset/s  | norm. time         | # trees in Rset/s  | norm. time         | # trees in Rset/s   | norm. time         | # trees in Rset/s   | norm. time         | # trees in Rset/s  |
| Monk2                        | 46.46     | $2.28 \times 10^6$ | 0.99<br>$\pm 0.02$ | 0.03<br>$\pm 0.02$ | 1.01<br>$\pm 0.00$ | 0.00<br>$\pm 0.00$  | 0.99<br>$\pm 0.02$ | 0.20<br>$\pm 0.11$  | 0.95<br>$\pm 0.00$ | 0.31<br>$\pm 0.04$ |
| COMPAS                       | 3.03      | $8.75 \times 10^4$ | 0.98<br>$\pm 0.03$ | 0.14<br>$\pm 0.17$ | 0.99<br>$\pm 0.01$ | 68.67<br>$\pm 2.34$ | 1.00<br>$\pm 0.00$ | 44.83<br>$\pm 2.17$ | 0.96<br>$\pm 0.01$ | 2.20<br>$\pm 0.34$ |
| Car Evaluation               | 207.76    | 101.27             | 0.95<br>$\pm 0.00$ | 0.00<br>$\pm 0.00$ | 1.01<br>$\pm 0.01$ | 0.03<br>$\pm 0.02$  | 1.00<br>$\pm 0.01$ | 0.71<br>$\pm 0.04$  | 0.97<br>$\pm 0.02$ | 0.03<br>$\pm 0.01$ |
| Bar                          | 266.79    | $1.91 \times 10^4$ | 0.96<br>$\pm 0.00$ | 0.15<br>$\pm 0.29$ | 1.00<br>$\pm 0.02$ | 4.78<br>$\pm 0.14$  | 1.00<br>$\pm 0.01$ | 3.88<br>$\pm 0.11$  | 0.96<br>$\pm 0.01$ | 0.06<br>$\pm 0.01$ |
| Coffee House                 | 81.77     | $1.45 \times 10^5$ | 0.99<br>$\pm 0.01$ | 0.00<br>$\pm 0.00$ | 1.00<br>$\pm 0.00$ | 2.60<br>$\pm 0.17$  | 1.00<br>$\pm 0.00$ | 0.67<br>$\pm 0.03$  | 0.99<br>$\pm 0.03$ | 0.06<br>$\pm 0.01$ |
| Expensive Restaurant         | 316.40    | $1.39 \times 10^6$ | 0.96<br>$\pm 0.01$ | 3.72<br>$\pm 1.31$ | 1.01<br>$\pm 0.00$ | 24.44<br>$\pm 0.76$ | 1.01<br>$\pm 0.01$ | 4.51<br>$\pm 0.15$  | 0.96<br>$\pm 0.01$ | 0.06<br>$\pm 0.01$ |
| Cheap Restaurant             | 74.91     | $3.89 \times 10^5$ | 0.99<br>$\pm 0.00$ | 0.98<br>$\pm 0.39$ | 1.00<br>$\pm 0.00$ | 59.63<br>$\pm 0.43$ | 1.01<br>$\pm 0.01$ | 17.75<br>$\pm 0.55$ | 0.96<br>$\pm 0.01$ | 0.15<br>$\pm 0.03$ |
| Bar-7                        | 13.11     | $1.13 \times 10^4$ | 1.01<br>$\pm 0.01$ | 0.67<br>$\pm 0.83$ | 1.00<br>$\pm 0.00$ | 22.78<br>$\pm 1.35$ | 1.00<br>$\pm 0.00$ | 8.06<br>$\pm 0.35$  | 1.03<br>$\pm 0.08$ | 0.33<br>$\pm 0.07$ |
| FICO                         | 3841.94   | 21.08              | 0.98<br>$\pm 0.03$ | 0.00<br>$\pm 0.00$ | 1.02<br>$\pm 0.01$ | 3.17<br>$\pm 0.03$  | 1.00<br>$\pm 0.02$ | 0.05<br>$\pm 0.00$  | 0.94<br>$\pm 0.00$ | 0.00<br>$\pm 0.00$ |
| Congressional Voting Records | 16.67     | 0.06               | 1.00<br>$\pm 0.01$ | 0.00<br>$\pm 0.00$ | 1.00<br>$\pm 0.00$ | 0.06<br>$\pm 0.00$  | 1.00<br>$\pm 0.00$ | 0.06<br>$\pm 0.00$  | 0.96<br>$\pm 0.02$ | 0.06<br>$\pm 0.00$ |

Table 2: Runtime and number of trees found for TreeFARMS and the four baselines. We show the runtime (in seconds) for TreeFARMS to find the Rashomon set. For the baselines, we show their average runtime and standard deviation normalized to that of TreeFARMS. For instance, a normalized time of 1.1 means more time than TreeFARMS by 10%. We also show the average number of trees in the Rashomon set produced per second and its standard deviation. The Congressional Voting Record dataset has only one tree in the Rashomon set. *The only method guaranteed to find the full Rashomon set is TreeFARMS.*

The images for the Monk2 dataset, shown in Figure 11, yield interesting results. When designing decision trees, we usually expect that the root split contains most of the information, and thus we might expect that much of the Rashomon set shares the same root split. All three embeddings in Figure 11, in which color identifies the feature that splits the root node, show that this is not the case. Interestingly, Figure 11a exhibits clustering, where each cluster includes models with different root splits, which is not what one might expect. Figure 11c suggests the importance of two prominent features that often appear at the root split, *holding\_sword* and *is\_smiling*, while still highlighting the diversity in the root node.

Querying the Rashomon set is now extremely easy. Here are some examples.

- *Find the 10 best trees.* The circles in Figure 11a identify the ten models with the best objective values. Interestingly, these trees appear in different parts of the space and have diverse structure.
- *Find the five sparsest trees with accuracy above 0.7.* Figure 11b shows the result. These trees are (again) diverse.
- *Find trees with feature head\_shape=square but neither head\_shape=round nor jacket\_color=red.*

The red circles in Figure 11c identify these trees. Constraining models in this way produces trees that use features quite different from all the trees on the left, even when they use the same root.

### G.3 Variable Importance: Model Class Reliance

**Collection and Set:** We ran this experiments on **COMPAS**, **Bar**, **Coffee House**, **Expensive Restaurant**. We find the whole Rashomon set of each dataset given  $\lambda = 0.01$  and  $\epsilon = 0.05$ , and calculate

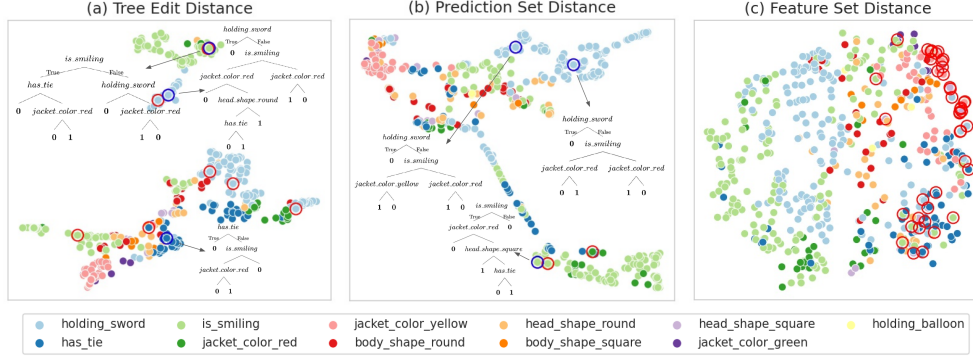

Figure 11: Dimension-reduced images of the Rashomon set for Monk2. Colors represent the feature on which we split at the root. Subfigures (a), (b), and (c) show the embedding using tree edit distance, prediction distance, and feature set distance, respectively. In (a), red and blue circles identify the 10 trees with the lowest objective; the blue circles correspond to the trees on the side. The circles in (b) identify the 5 sparsest trees with accuracy above 0.7. The circles in (c) correspond to trees that use feature *head\_shape=square* but not *head\_shape=round* and not *jacket\_color=red*.

$MCR_-$  and  $MCR_+$  of each feature as described in Appendix D. We then study how sampling can help us estimate the true model class reliance by sampling 1%, 5%, and 25% trees from the Rashomon set and calculating the MCR based on these subsets of the Rashomon set. Figure 12 shows sampled MCR converges to true MCR. For each sampling proportion, we use 5 different random seeds to compute the average and standard deviation of  $MCR_-$  and  $MCR_+$ . We ran this particular experiment on a 2.7Ghz (768GB RAM 48 cores) Intel Xeon Gold 6226 processor. We set a 200-GB memory limit.

**Results:** Figure 12 shows the model class reliance on four different datasets. For the COMPAS dataset (top-left subfigure), features related to prior counts generally have high  $MCR_+$ , which means these features are very important for some of the trees in the Rashomon set. For the Bar dataset (top-right subfigure), features “Bar\_1-3” and “Bar\_4-8” have dominant  $MCR_+$  and  $MCR_-$  compared with other features, indicating that for all well-performing trees, these features are the most important. Similarly, features “CoffeeHouse\_1 3” and “CoffeeHouse\_4 8” have dominant  $MCR_+$  and  $MCR_-$ . This makes sense, since people who go to bar or coffee house regularly would be likely to accept a coupon for a bar or a coffee house.

Sampling can help us calculate MCR more efficiently by considering only part of the whole Rashomon set. Figure 12 shows that sampled MCR, in general, converges to true MCR even if only 1% or 5% of trees are sampled.

#### G.4 Balanced Accuracy and F1-score Rashomon set from Accuracy Rashomon set

**Collection and Set:** We ran this experiments on three imbalanced datasets **Breast Cancer, Cheap Restaurant, Takeaway Food**. We ran this particular experiment on a 2.7Ghz (768GB RAM 48 cores) Intel Xeon Gold 6226 processor. We set a 200-GB memory limit.

**Results:** Figure 13, 14 show trees in the Accuracy Rashomon set which covers the Balanced Accuracy Rashomon set and F1-score Rashomon set respectively. The black dashed line indicates the corresponding objective thresholds and blue dots below the dashed line are trees within these Rashomon sets. In some cases, the tree with the minimum misclassification objective is also the tree with the minimum other metric objective (see Figure 13 left and Figure 14 right). But this is not always guaranteed. For example, in the right subfigure of Figure 13, a single split node has the optimal accuracy objective (in yellow), while another three-leaf tree minimizes the balanced accuracy objective (in green). Actually, many trees have better balanced accuracy objective than the tree that minimizes the accuracy objective. A similar pattern holds for the F1-score Rashomon set (see left subfigure Figure 14).

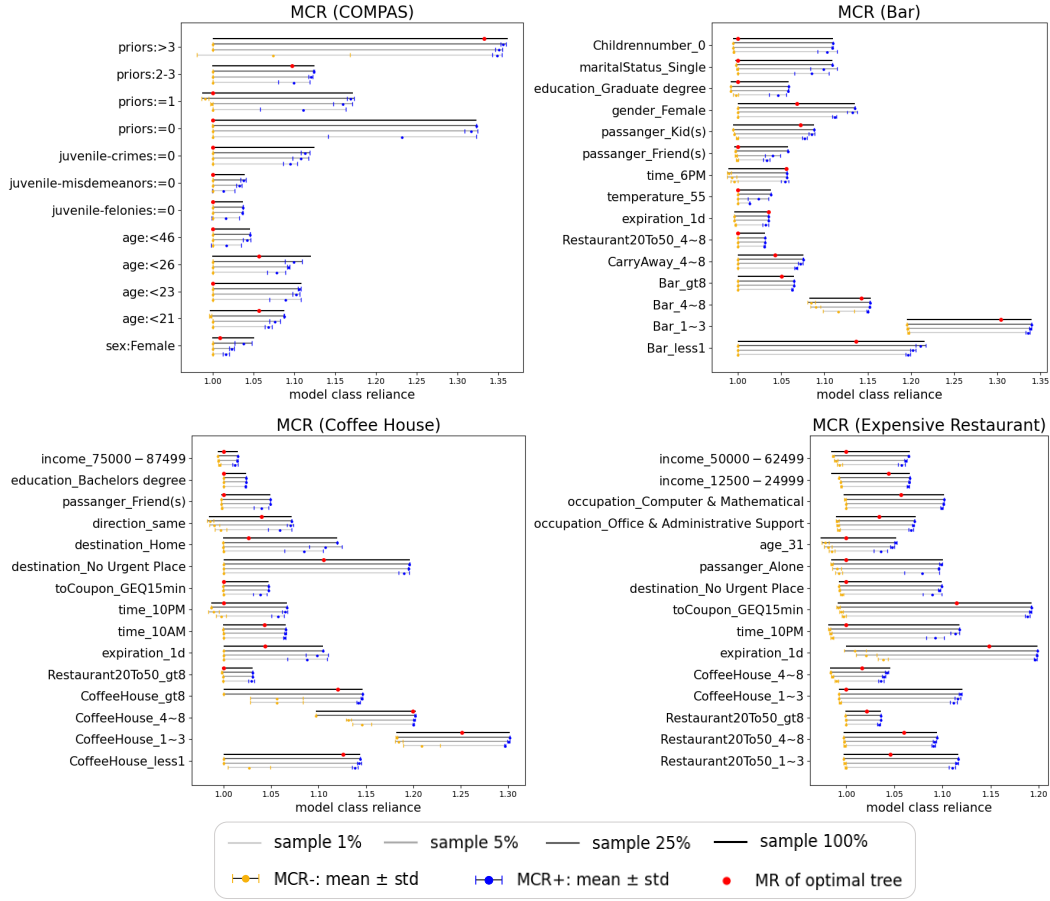

Figure 12: Variable Importance: Model class reliance on the COMPAS, Bar, Coffee House, and Expensive Restaurant ( $\lambda = 0.01$ ,  $\epsilon = 0.05$ ). Four different line segments colored in different gray levels are model class reliance calculated by sampling different proportions from the whole Rashomon set. Yellow/blue dots with bars indicate  $MCR_-/MCR_+$  within one standard deviation of the mean. “Sample 100%” means using the whole Rashomon set and there is no variation. Red dots indicate the model reliance (variable importance) calculated by the optimal tree.

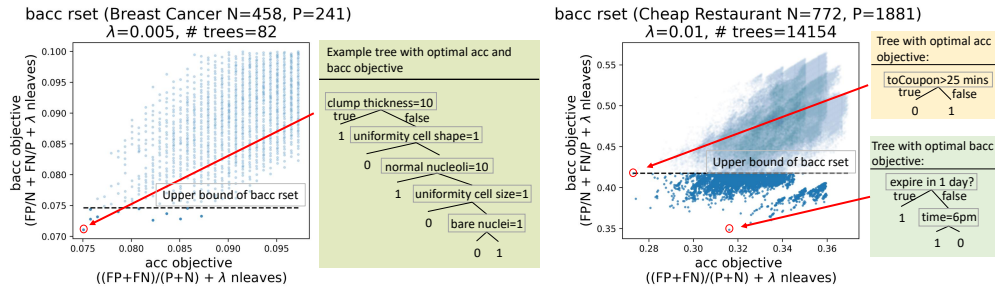

Figure 13: Example of Balanced Accuracy Rashomon sets. # trees indicates the number of trees within the Balanced Accuracy Rashomon set. Trees in the yellow region have optimal accuracy objective and trees in the green region have optimal balanced accuracy. (Breast Cancer:  $\lambda = 0.005$ , Cheap Restaurant:  $\lambda = 0.01$ )

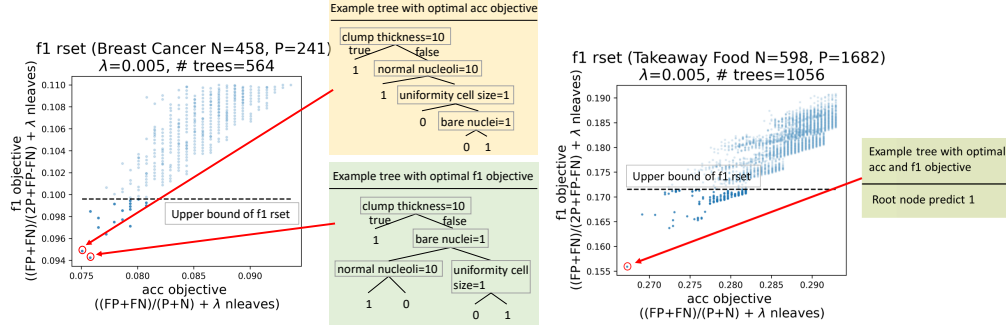

Figure 14: Example of F1-Score Rashomon set. # trees indicates the number of trees within the F1-score Rashomon set. Trees in the yellow region have optimal accuracy objective and trees in the green region have optimal F1-score objective. (Breast Cancer:  $\lambda = 0.005$ , Takeaway Food:  $\lambda = 0.005$ )

### G.5 Rashomon set after removing a group of samples

**Collection and Set:** We ran this experiments on **Monk2, COMPAS, Bar, Expensive Restaurant**. We ran this particular experiment on a 2.7Ghz (768GB RAM 48 cores) Intel Xeon Gold 6226 processor. We set a 200-GB memory limit.

**Results:** Figure 15 show accuracy objective on the full dataset versus objective on the reduced dataset after 1% of different samples are removed on the Bar and Monk2 datasets. The black dashed line indicates the objective threshold of the reduced Rashomon set and blue dots below the dashed line are trees within the reduced Rashomon set. Similar to Figure 5 all scatter plots show a high correlation between the accuracy objective on the full dataset and the reduced dataset, indicating sparse near-optimal trees are robust to the shift in sample distribution. Optimal trees on the reduced dataset might be different, as we see by comparing the trees in the orange region and blue region.

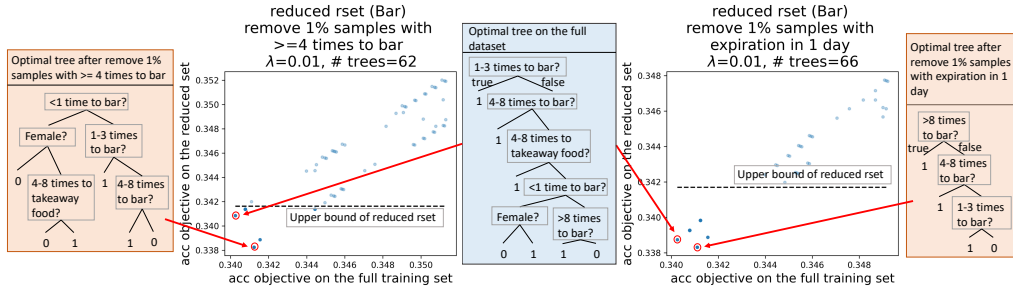

(a) Example Rashomon sets and optimal trees after we remove the 1% of samples with “number of times to bar  $\geq 4$ ” (left) and “expiration of coupon in 1 day” (right) on the Bar dataset.

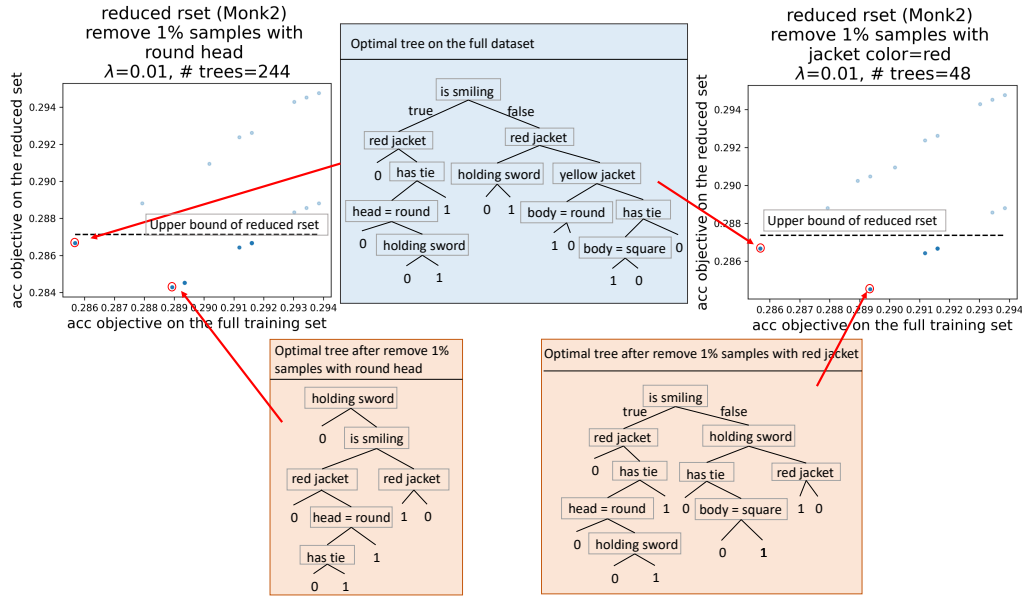

(b) Example Rashomon sets and optimal trees after we remove the 1% of samples with “round head” (left) and “red jacket” (right) on the Monk2 dataset.

Figure 15: Example Rashomon sets and optimal trees after 1% of samples are removed. The optimal tree on the full dataset is shown in the blue region and optimal trees on the corresponding reduced datasets are in the orange region.

## Appendix References

- [51] Aaron Fisher, Cynthia Rudin, and Francesca Dominici. All models are wrong, but many are useful: Learning a variable’s importance by studying an entire class of prediction models simultaneously. *Journal of Machine Learning Research*, 20(177):1–81, 2019.
- [52] Dheeru Dua and Casey Graff. UCI machine learning repository, 2017.
- [53] Kristen B Gorman, Tony D Williams, and William R Fraser. Ecological sexual dimorphism and environmental variability within a community of antarctic penguins (genus *pygoscelis*). *PloS one*, 9(3):e90081, 2014.
- [54] J. Larson, S. Mattu, L. Kirchner, and J. Angwin. How we analyzed the COMPAS recidivism algorithm. *ProPublica*, 2016.
- [55] FICO, Google, Imperial College London, MIT, University of Oxford, UC Irvine, and UC Berkeley. Explainable Machine Learning Challenge. <https://community.fico.com/s/explainable-machine-learning-challenge>, 2018.
- [56] Tong Wang, Cynthia Rudin, Finale Doshi-Velez, Yimin Liu, Erica Klampfl, and Perry MacNeille. A bayesian framework for learning rule sets for interpretable classification. *The Journal of Machine Learning Research*, 18(1):2357–2393, 2017.
- [57] The pandas development team. pandas-dev/pandas: Pandas, February 2020.
- [58] Xiyang Hu, Cynthia Rudin, and Margo Seltzer. Optimal sparse decision trees. In *Advances in Neural Information Processing Systems (NeurIPS)*, 2019.
- [59] Jimmy Lin, Chudi Zhong, Diane Hu, Cynthia Rudin, and Margo Seltzer. Generalized and scalable optimal sparse decision trees. In *International Conference on Machine Learning*, pages 6150–6160. PMLR, 2020.
- [60] Rodney Sparapani, Charles Spanbauer, and Robert McCulloch. Nonparametric machine learning and efficient computation with Bayesian additive regression trees: The BART R package. *Journal of Statistical Software*, 97(1):1–66, 2021.
- [61] F. Pedregosa, G. Varoquaux, A. Gramfort, V. Michel, B. Thirion, O. Grisel, M. Blondel, P. Prettenhofer, R. Weiss, V. Dubourg, J. Vanderplas, A. Passos, D. Cournapeau, M. Brucher, M. Perrot, and E. Duchesnay. Scikit-learn: Machine learning in Python. *Journal of Machine Learning Research*, 12:2825–2830, 2011.
- [62] Yingfan Wang, Haiyang Huang, Cynthia Rudin, and Yaron Shaposhnik. Understanding how dimension reduction tools work: an empirical approach to deciphering t-SNE, UMAP, TriMAP, and PaCMAP for data visualization. *J Mach. Learn. Res*, 22:1–73, 2021.
